# Supplementary material for: Anticholinergic Drug Exposure and the Risk of Dementia: A Nested Case-Control Study
Source: PubMed Central journal article supplement (PMC6593623; doi:10.1001/jamainternmed.2019.0677), 2019-06-24
Supplement: jamainternmed-179-1084-s001.pdf [file jamainternmed-179-1084-s001.pdf]

## Supplementary Online Content

Coupland CAC, Hill T, Denning T, Morriss R, Moore M, Hippisley-Cox J. Anticholinergic drug exposure and the risk of dementia: a nested case-control study. *JAMA Intern Med*. Published online June 24, 2019. doi:10.1001/jamainternalmed.2019.0677.

- eFigure 1** Selection of cases and controls for the analysis based on exposures in the 1 to 11 years before index date
- eFigure 2** Proportions of cases and controls prescribed different types of anticholinergic drug in the 1 to 11 years before diagnosis
- eTable 1** Anticholinergic drugs included as exposures
- eTable 2** Recording of dementia type and recorded source of diagnosis in cases
- eTable 3** Numbers of cases and controls prescribed individual anticholinergic drugs in the 1 to 11 years before the index date
- eTable 4** Numbers of cases and controls prescribed different types of anticholinergic drugs in the 3 to 13 years before the index date
- eTable 5** Numbers of cases and controls prescribed different types of anticholinergic drugs in the 5 to 20 years before the index date
- eTable 6** Adjusted odds ratios for cumulative use of anticholinergic drug types in the 1 to 11, 3 to 13 and 5 to 20 years before the index date
- eTable 7** Numbers of cases and controls prescribed anticholinergic drug types in the 1 to 11, 3 to 13 and 5 to 20 years before the index date
- eTable 8** Adjusted odds ratios for cumulative use of anticholinergic drugs in the 1 to 11 years before index date: separate analyses in cases aged less than 80 at diagnosis of dementia and cases aged 80 and over at diagnosis, with their respective matched controls
- eTable 9** Adjusted odds ratios for cumulative use of anticholinergic drugs in the 1 to 11 years before the index date: separate analyses in men and women, with their respective matched controls
- eTable 10** Adjusted odds ratios for cumulative use of anticholinergic drugs in the 1 to 11 years before index date: separate analyses in cases with Alzheimer's, cases with vascular dementia, and cases with other types or unspecified type of dementia with their respective matched controls
- eTable 11** Adjusted odds ratios for total cumulative use in DDDs of anticholinergic drugs in 1 to 11, 3 to 13 and 5 to 20 years before the index date
- eTable 12** Adjusted odds ratios for cumulative use of anticholinergic drugs in 1 to 11 years before index date: multiple imputation results

**eTable 13** Adjusted odds ratios for cumulative use of anticholinergic drugs in the 1 to 11 years before index date: restricted to the anticholinergic drugs included in Gray study

This supplementary material has been provided by the authors to give readers additional information about their work.

eFigure 1 Selection of cases and controls for the analysis based on exposures in the 1 to 11 years before index date

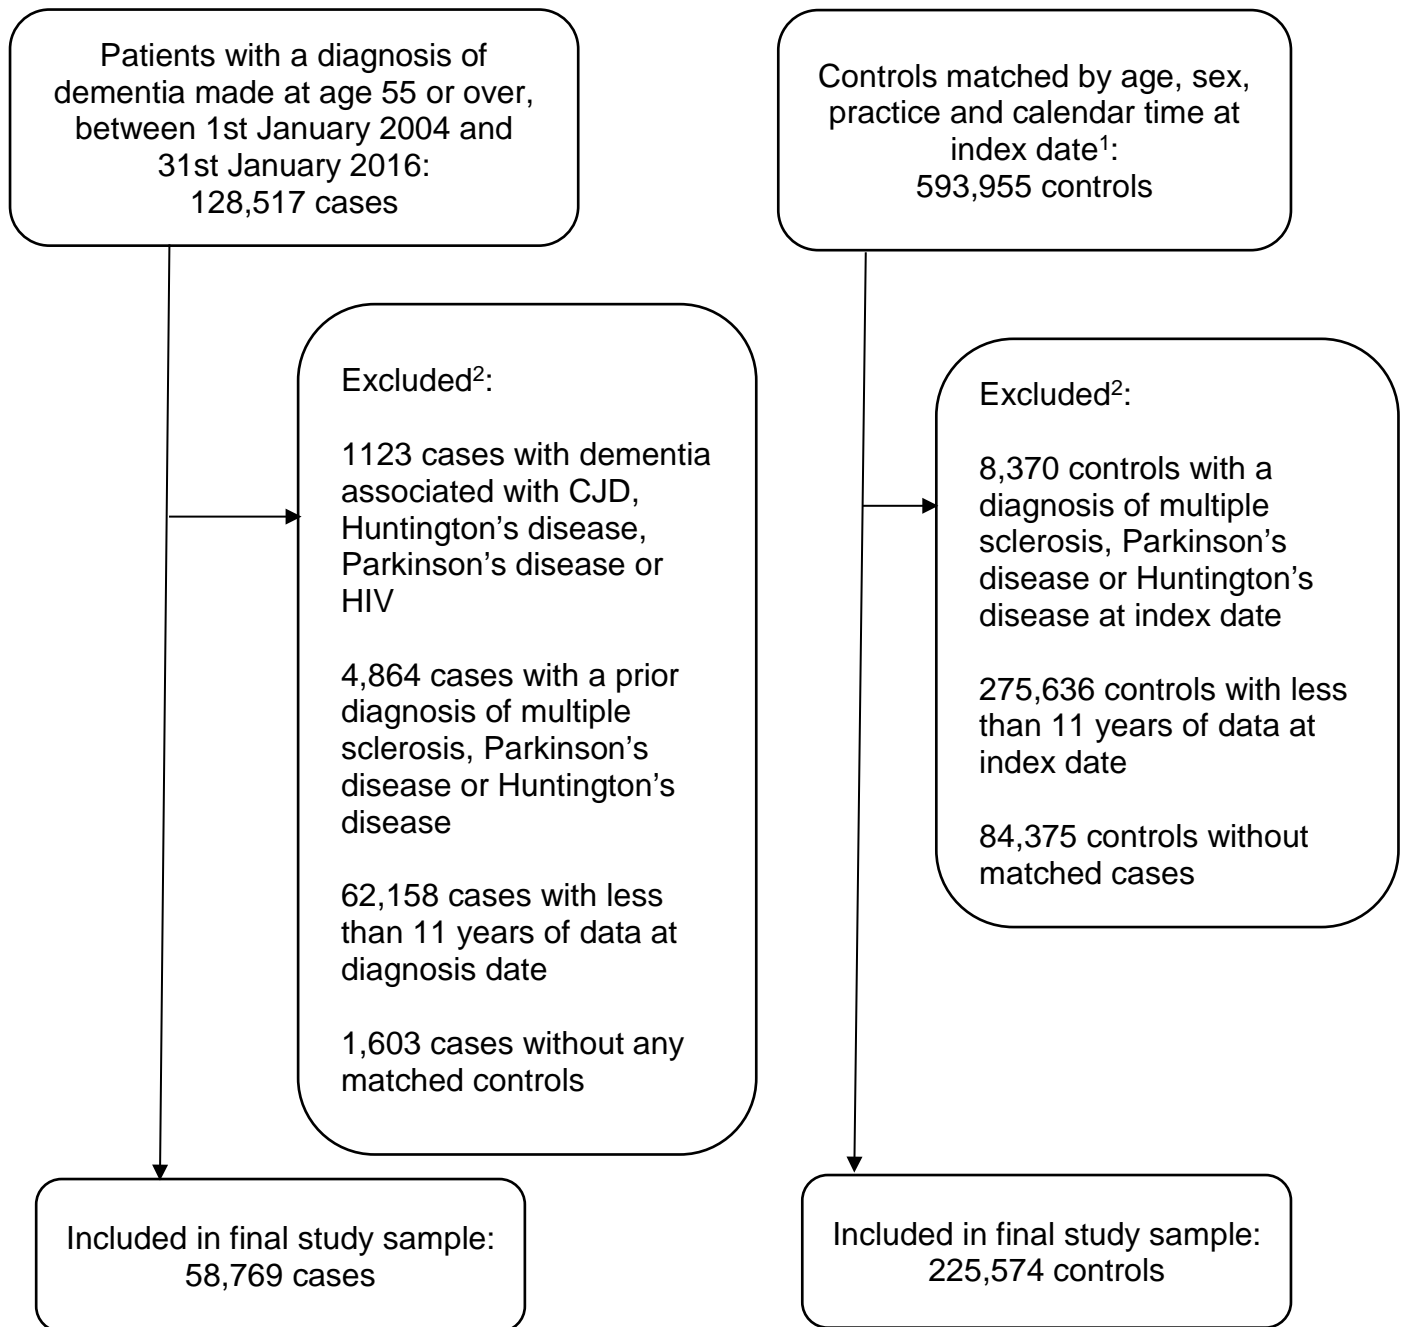

<sup>1</sup> Index date in controls is date of diagnosis of dementia in their matched cases

<sup>2</sup> Exclusion criteria were applied in the order shown

eFigure 2 Proportions of cases and controls prescribed different types of anticholinergic drug in the 1 to 11 years before diagnosis

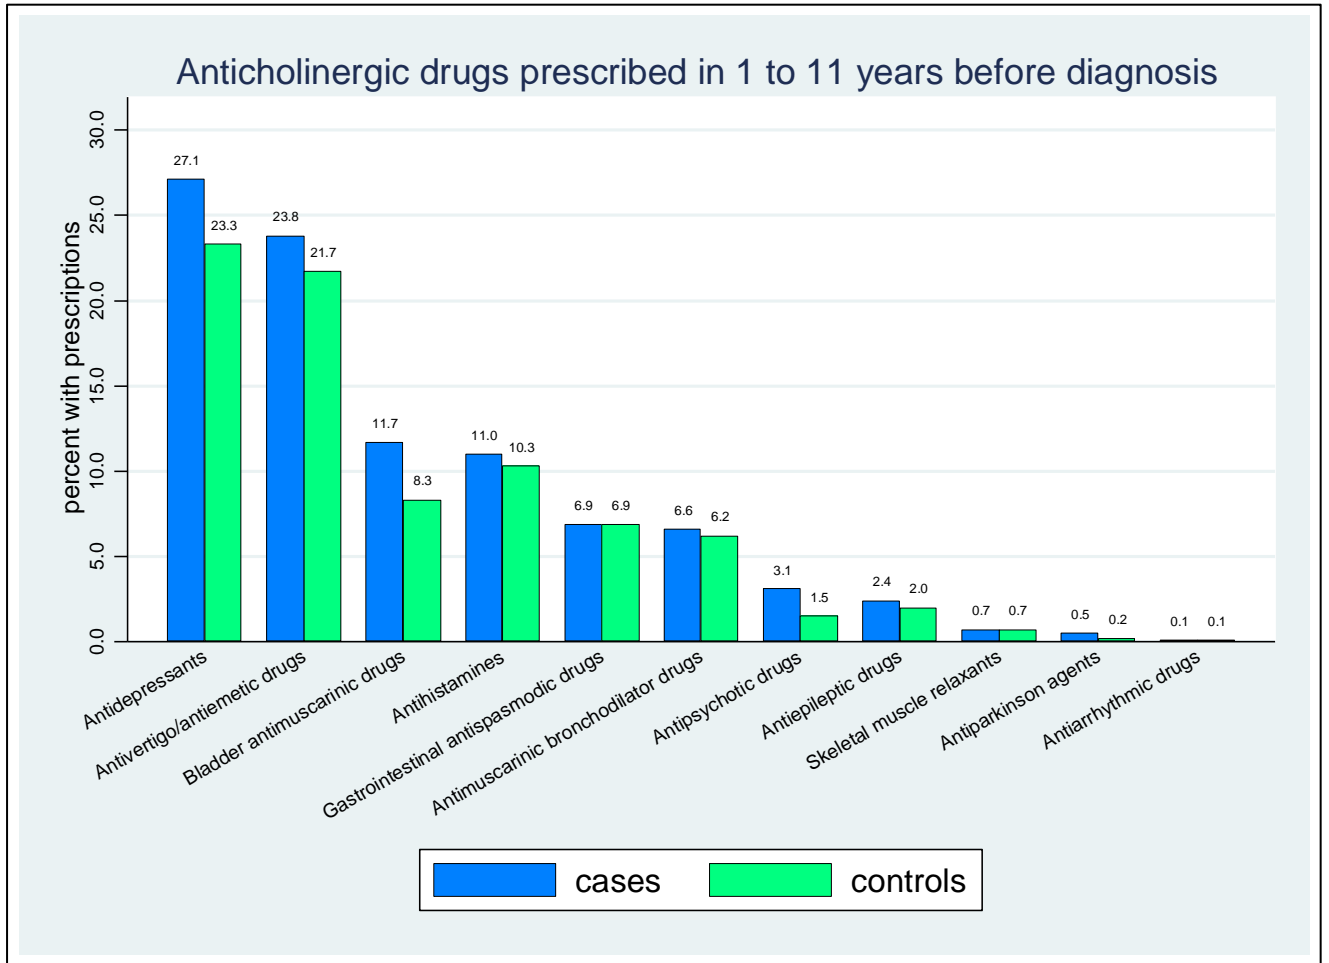

eTable 1 Anticholinergic drugs included as exposures

| Drug name and type                | Basis for inclusion                                  | Minimum effective daily dose (MEDD) in older people <sup>a</sup> | Defined daily dose (DDD) <sup>b</sup>  |
|-----------------------------------|------------------------------------------------------|------------------------------------------------------------------|----------------------------------------|
| <b>Antiarrhythmic drugs</b>       |                                                      |                                                                  |                                        |
| Disopyramide                      | Gray Criteria <sup>c</sup>                           | 400 mg                                                           | 400 mg                                 |
| <b>Antihistamines</b>             |                                                      |                                                                  |                                        |
| Azatadine                         | Gray Criteria <sup>c</sup>                           | 2 mg                                                             | 2 mg                                   |
| Brompheniramine                   | Gray Criteria <sup>c</sup>                           | 12 mg                                                            | 24 mg                                  |
| Chlorpheniramine (Chlorphenamine) | Gray Criteria <sup>c</sup>                           | 4 mg                                                             | 12 mg                                  |
| Clemastine                        | Gray Criteria <sup>c</sup>                           | 2 mg                                                             | 2 mg                                   |
| Cyproheptadine                    | Gray Criteria <sup>c</sup>                           | 4 mg                                                             | 12 mg                                  |
| Diphenhydramine                   | Gray Criteria <sup>c</sup>                           | 50 mg                                                            | 200 mg                                 |
| Hydroxyzine                       | Gray Criteria <sup>c</sup>                           | 75 mg                                                            | 75 mg                                  |
| Trimeprazine (Alimemazine)        | Gray Criteria <sup>c</sup>                           | 10 mg                                                            | 30 mg                                  |
| <b>Antidepressants</b>            |                                                      |                                                                  |                                        |
| Amitriptyline                     | Gray Criteria <sup>c</sup>                           | 10 mg                                                            | 75 mg                                  |
| Clomipramine                      | Gray Criteria <sup>c</sup>                           | 25 mg                                                            | 100 mg                                 |
| Dosulepin                         | Review of BNF/<br>summary of product characteristics | 75 mg <sup>f</sup>                                               | 150 mg                                 |
| Doxepin                           | Gray Criteria <sup>c</sup>                           | 10 mg                                                            | 100 mg                                 |
| Imipramine                        | Gray Criteria <sup>c</sup>                           | 10 mg                                                            | 100 mg                                 |
| Lofepramine                       | Review of BNF/<br>summary of product characteristics | 70 mg <sup>f</sup>                                               | 105 mg                                 |
| Nortriptyline                     | Gray Criteria <sup>c</sup>                           | 10 mg                                                            | 75 mg                                  |
| Paroxetine                        | Gray Criteria <sup>c</sup>                           | 10 mg                                                            | 20 mg                                  |
| Trimipramine                      | Gray Criteria <sup>c</sup>                           | 50 mg                                                            | 150 mg                                 |
| <b>Antiepileptics</b>             |                                                      |                                                                  |                                        |
| Carbamazepine                     | Included in ACB scale <sup>e</sup>                   | 200 mg <sup>f</sup>                                              | 1000 mg                                |
| Oxcarbazepine                     | Included in ACB scale <sup>e</sup>                   | 600 mg <sup>f</sup>                                              | 1000 mg                                |
| <b>Antivertigo/antiemetic</b>     |                                                      |                                                                  |                                        |
| Cyclizine                         | Gray Criteria <sup>c</sup>                           | 50 mg                                                            | 100 mg                                 |
| Dimenhydrinate                    | Gray Criteria <sup>c</sup>                           | 200 mg                                                           | 200 mg <sup>h</sup>                    |
| Prochlorperazine                  | Gray Criteria <sup>c</sup>                           | 15 mg                                                            | 100 mg                                 |
| Promethazine                      | Gray Criteria <sup>c</sup>                           | 50 mg                                                            | 25 mg                                  |
| Promazine                         | Gray Criteria <sup>c</sup>                           | 25 mg <sup>f</sup>                                               | 300 mg (tablet)<br>100 mg (parenteral) |
| <b>Antiparkinson agents</b>       |                                                      |                                                                  |                                        |
| Benztropine (Benzatropine)        | Gray Criteria <sup>c</sup>                           | 0.5 mg                                                           | 2 mg                                   |

|                                        |                                                                                                                               |                               |                                       |
|----------------------------------------|-------------------------------------------------------------------------------------------------------------------------------|-------------------------------|---------------------------------------|
| Orphenadrine                           | Gray Criteria <sup>c</sup>                                                                                                    | 200 mg                        | 200 mg (chloride)<br>120 mg (citrate) |
| Procyclidine                           | Gray Criteria <sup>c</sup>                                                                                                    | 7.5 mg                        | 25 mg                                 |
| Trihexyphenidyl                        | Gray Criteria <sup>c</sup>                                                                                                    | 6 mg                          | 10 mg                                 |
| <b>Antipsychotics</b>                  |                                                                                                                               |                               |                                       |
| Chlorpromazine                         | Gray Criteria <sup>c</sup>                                                                                                    | 10 mg                         | 300 mg (oral)<br>100 mg (parenteral)  |
| Clozapine                              | Gray Criteria <sup>c</sup>                                                                                                    | 20 mg                         | 300 mg                                |
| Methotrimeprazine<br>(levomepromazine) | Classified as high<br>potency<br>anticholinergic in<br>Duran review <sup>d</sup> and<br>included in ACB<br>scale <sup>e</sup> | 25 mg <sup>f</sup>            | 300 mg                                |
| Olanzapine                             | Gray Criteria <sup>c</sup>                                                                                                    | 2.5 mg                        | 10 mg                                 |
| Pericyazine                            | Review of<br>BNF/summary of<br>product characteristics                                                                        | 10 mg <sup>f</sup>            | 50 mg                                 |
| Perphenazine                           | Classified as high<br>potency<br>anticholinergic in<br>Duran review <sup>d</sup> and<br>included in ACB<br>scale <sup>e</sup> | 4 mg <sup>f</sup>             | 30 mg (oral)                          |
| Pimozide                               | Gray Criteria <sup>c</sup>                                                                                                    | 1 mg                          | 4 mg                                  |
| Quetiapine                             | Included in ACB<br>scale <sup>e</sup>                                                                                         | 25 mg <sup>f</sup>            | 400 mg                                |
| Thioridazine                           | Gray Criteria <sup>c</sup>                                                                                                    | 10 mg                         | 300 mg                                |
| Trifluoperazine                        | Gray Criteria <sup>c</sup>                                                                                                    | 0.5 mg                        | 20 mg                                 |
| <b>Bladder<br/>antimuscarinics</b>     |                                                                                                                               |                               |                                       |
| Darifenacin                            | Gray Criteria <sup>c</sup>                                                                                                    | 7.5 mg                        | 7.5 mg                                |
| Fesoterodine                           | Gray Criteria <sup>c</sup>                                                                                                    | 4 mg <sup>f</sup>             | 4 mg                                  |
| Flavoxate                              | Gray Criteria <sup>c</sup>                                                                                                    | 300 mg                        | 800 mg                                |
| Oxybutynin                             | Gray Criteria <sup>c</sup>                                                                                                    | 5 mg (oral)<br>3.9 mg (patch) | 15 mg (oral)<br>3.9 mg (transdermal)  |
| Propiverine                            | Included in ACB<br>scale <sup>e</sup>                                                                                         | 15 mg <sup>f</sup>            | 30 mg                                 |
| Solifenacin                            | Gray Criteria <sup>c</sup>                                                                                                    | 5 mg                          | 5 mg                                  |
| Tolterodine                            | Gray Criteria <sup>c</sup>                                                                                                    | 2 mg                          | 4 mg                                  |
| Trospium                               | Gray Criteria <sup>c</sup>                                                                                                    | 20 mg                         | 40 mg                                 |
| <b>Skeletal muscle<br/>relaxants</b>   |                                                                                                                               |                               |                                       |
| Methocarbamol                          | Included in ACB<br>scale <sup>e</sup>                                                                                         | 2000 mg <sup>f</sup>          | 3000 mg                               |
| Tizanidine                             | Classified as high<br>potency<br>anticholinergic in<br>Duran review <sup>d</sup>                                              | 2 mg <sup>f</sup>             | 12 mg                                 |
| <b>Gastrointestinal antispasmodics</b> |                                                                                                                               |                               |                                       |

|                                            |                                                                                  |                                                                                                                                 |                                                                                          |
|--------------------------------------------|----------------------------------------------------------------------------------|---------------------------------------------------------------------------------------------------------------------------------|------------------------------------------------------------------------------------------|
| Alverine                                   | Gray Criteria <sup>c</sup>                                                       | 60 mg <sup>f</sup>                                                                                                              | 240 mg <sup>h</sup>                                                                      |
| Atropine products                          | Gray Criteria <sup>c</sup>                                                       | 0.0582 mg                                                                                                                       | 1.5 mg                                                                                   |
| Dicyclomine<br>(Dicycloverine)             | Gray Criteria <sup>c</sup>                                                       | 40 mg                                                                                                                           | 80 mg                                                                                    |
| Propantheline                              | Gray Criteria <sup>c</sup>                                                       | 22.5 mg                                                                                                                         | 60 mg                                                                                    |
| Scopolamine<br>(hyoscine)                  | Gray Criteria <sup>c</sup>                                                       | 0.0195 mg (oral)<br>0.33 mg (patch)<br>30 mg <sup>f</sup><br>(butylscopolamine<br>form)                                         | 0.9 mg<br>(hydrobromide form)<br>60 mg (butylbromide<br>form)                            |
| <b>Antimuscarinic bronchodilator drugs</b> |                                                                                  |                                                                                                                                 |                                                                                          |
| Glycopyrrolate<br>(Glycopyrronium)         | Gray Criteria <sup>c</sup>                                                       | 0.6 mg (oral)<br>0.044 mg <sup>g</sup> (inhaled<br>powder)                                                                      | 3 mg (oral)<br>0.044 mg (inhaled<br>powder)                                              |
| Ipratropium                                | Classified as high<br>potency<br>anticholinergic in<br>Duran review <sup>d</sup> | 0.24 mg <sup>g</sup> (nasal)<br>0.12 mg <sup>g</sup> (inhalation-<br>aerosol)<br>0.3 mg <sup>g</sup> (inhalation -<br>solution) | 0.24 mg (nasal)<br>0.12 mg (inhalation-<br>aerosol)<br>0.3 mg (inhalation -<br>solution) |

BNF = British National Formulary

<sup>a</sup> Minimum effective daily dose (MEDD) recommended for use in older adults obtained from the Geriatric Dosage Handbook (Semla TP, Beizer JL, MD. H. Geriatric Dosage Handbook. 15th edition. Hudson, Ohio : Lexi-Comp, 2010)

<sup>b</sup> Defined daily dose (DDD) values assigned by the World Health Organisation's (WHO) Collaborating Centre for Drug Statistics Methodology ([https://www.whocc.no/atc\\_ddd\\_index/](https://www.whocc.no/atc_ddd_index/))

<sup>c</sup> These drugs were included in the Gray study (Gray SL, Anderson ML, Dublin S, et al. Cumulative use of strong anticholinergics and incident dementia: A prospective cohort study. JAMA Internal Medicine 2015;175:401-07). They include drugs identified as having strong anticholinergic properties by the American Geriatrics Society 2012 Beers Criteria Update Expert Panel and some further drugs identified as strong anticholinergic drugs. Restricted to drugs which have been prescribed in England (based on 1998/2014 Prescription Cost Analysis data).

<sup>d</sup> Additional drug included based on assessment in Duran review (Durán C, Azermai M, Vander Stichele R. Systematic review of anticholinergic risk scales in older adults. Eur J Clin Pharmacol 2013;69:1485-96.)

<sup>e</sup> Additional drug included based on a score of 2 or 3 in the Anti-Cholinergic Burden (ACB) Scale (Boustani M, Campbell N, Munger S, et al. Impact of anticholinergics on the aging brain: a review and practical application. Aging Health 2008;4:311-20.)

<sup>f</sup> Value is lowest recommended dose in older people obtained from BNF

<sup>g</sup> DDD value used as a MEDD value was not available

<sup>h</sup> Value is recommended dose obtained from BNF as a DDD value was not available

eTable 2 Recording of dementia type and recorded source of diagnosis in cases

|                                                                     | <b>Cases<br/>(N=58,769)</b> |
|---------------------------------------------------------------------|-----------------------------|
|                                                                     | N (%)                       |
| <b>Dementia type</b>                                                |                             |
| Alzheimer's (including mixed)                                       | 22,034 (60.1) <sup>a</sup>  |
| Vascular dementia                                                   | 13,313 (36.3) <sup>a</sup>  |
| Other types                                                         | 1319 (3.6) <sup>a</sup>     |
| Dementia type unspecified/not known                                 | 19,024                      |
| Dementia drug/death code only                                       | 3079                        |
|                                                                     |                             |
| <b>Recording of dementia diagnosis</b>                              |                             |
| Diagnosis code in GP record only                                    | 41,535 (70.7)               |
| Dementia drug prescription only                                     | 1362 (2.3)                  |
| Death record code only                                              | 1640 (2.8)                  |
| GP diagnosis code and dementia drug prescription                    | 11,202 (19.1)               |
| GP diagnosis code and death record code                             | 2196 (3.7)                  |
| Dementia drug prescription and death record code                    | 77 (0.1)                    |
| GP diagnosis code, dementia drug prescription and death record code | 757 (1.3)                   |

<sup>a</sup> % is out of 36,666 cases with dementia type recorded



eTable 3 Numbers of cases and controls prescribed individual anticholinergic drugs in the 1 to 11 years before the index date

| Drug name and type     | Cases (N=58,769)              |                                   |                                                   |                                            | Controls (N=225,574)          |                                   |                                                   |                                            |
|------------------------|-------------------------------|-----------------------------------|---------------------------------------------------|--------------------------------------------|-------------------------------|-----------------------------------|---------------------------------------------------|--------------------------------------------|
|                        | Number with prescriptions (%) | Total number of prescriptions (%) | Median number of prescriptions <sup>a</sup> (IQR) | Median cumulative dose <sup>ab</sup> (IQR) | Number with prescriptions (%) | Total number of prescriptions (%) | Median number of prescriptions <sup>a</sup> (IQR) | Median cumulative dose <sup>ab</sup> (IQR) |
| <b>Antihistamines</b>  |                               |                                   |                                                   |                                            |                               |                                   |                                                   |                                            |
| Azatadine              | 2 (0)                         | 20 (0)                            | 10 (1, 19)                                        | 805 (14, 1596)                             | 3 (0)                         | 3 (0)                             | 1 (1, 1)                                          | 28 (10, 28)                                |
| Brompheniramine        | 331 (0.6)                     | 871 (0.1)                         | 1 (1, 2)                                          | 13 (13, 28)                                | 1312 (0.6)                    | 2973 (0.1)                        | 1 (1, 2)                                          | 13 (13, 28)                                |
| Chlorpheniramine       | 4801 (8.2)                    | 20175 (2.1)                       | 1 (1, 2)                                          | 30 (28, 84)                                | 17249 (7.7)                   | 66995 (2.7)                       | 1 (1, 2)                                          | 30 (28, 84)                                |
| Clemastine             | 42 (0.1)                      | 238 (0)                           | 1 (1, 2)                                          | 23 (15, 60)                                | 151 (0.1)                     | 1202 (0)                          | 1 (1, 3)                                          | 30 (15, 90)                                |
| Cyproheptadine         | 37 (0.1)                      | 185 (0)                           | 1 (1, 2)                                          | 60 (30, 126)                               | 81 (0)                        | 634 (0)                           | 1 (1, 5)                                          | 60 (30, 330)                               |
| Diphenhydramine        | 136 (0.2)                     | 879 (0.1)                         | 1 (1, 3)                                          | 16 (10, 60)                                | 386 (0.2)                     | 2212 (0.1)                        | 1 (1, 2)                                          | 16 (10, 32)                                |
| Hydroxyzine            | 1734 (3)                      | 10418 (1.1)                       | 1 (1, 3)                                          | 12 (9, 37)                                 | 6071 (2.7)                    | 36621 (1.5)                       | 1 (1, 3)                                          | 13 (9, 37)                                 |
| Trimeprazine           | 177 (0.3)                     | 1365 (0.1)                        | 1 (1, 3)                                          | 56 (28, 112)                               | 643 (0.3)                     | 6631 (0.3)                        | 1 (1, 4)                                          | 56 (28, 164)                               |
| <b>Antidepressants</b> |                               |                                   |                                                   |                                            |                               |                                   |                                                   |                                            |
| Amitriptyline          | 11533 (19.6)                  | 225964 (23.7)                     | 3 (1, 19)                                         | 168 (56, 1190)                             | 40423 (17.9)                  | 626136 (25.0)                     | 2 (1, 12)                                         | 140 (56, 784)                              |
| Clomipramine           | 294 (0.5)                     | 10448 (1.1)                       | 8 (1, 64)                                         | 522 (44, 4116)                             | 726 (0.3)                     | 25085 (1.0)                       | 9 (1, 60)                                         | 417 (34, 3136)                             |
| Dosulepin              | 3183 (5.4)                    | 89877 (9.4)                       | 6 (1, 39)                                         | 140 (28, 1020)                             | 9294 (4.1)                    | 240513 (9.6)                      | 5 (1, 36)                                         | 123 (28, 931)                              |
| Doxepin                | 280 (0.5)                     | 3861 (0.4)                        | 2 (1, 13)                                         | 251 (70, 1582)                             | 922 (0.4)                     | 14396 (0.6)                       | 2 (1, 14)                                         | 294 (140, 1610)                            |
| Imipramine             | 472 (0.8)                     | 9493 (1.0)                        | 3 (1, 25)                                         | 251 (70, 2800)                             | 1329 (0.6)                    | 28661 (1.1)                       | 3 (1, 25)                                         | 232 (70, 3000)                             |
| Lofepramine            | 1059 (1.8)                    | 15065 (1.6)                       | 2 (1, 10)                                         | 112 (56, 560)                              | 2655 (1.2)                    | 34489 (1.4)                       | 2 (1, 8)                                          | 84 (56, 448)                               |
| Nortriptyline          | 576 (1)                       | 8483 (0.9)                        | 3 (1, 12)                                         | 158 (56, 684)                              | 1935 (0.9)                    | 24809 (1.0)                       | 2 (1, 11)                                         | 120 (56, 668)                              |
| Paroxetine             | 1804 (3.1)                    | 55675 (5.8)                       | 8 (2, 41)                                         | 600 (120, 3300)                            | 4616 (2.1)                    | 123554 (4.9)                      | 6 (1, 38)                                         | 480 (60, 2970)                             |
| Trimipramine           | 195 (0.3)                     | 8623 (0.9)                        | 18 (2, 72)                                        | 504 (56, 2644)                             | 567 (0.3)                     | 23641 (0.9)                       | 22 (2, 65)                                        | 546 (29, 2128)                             |

| Drug name and type                  | Cases (N=58,769)              |                                   |                                                   |                                            | Controls (N=225,574)          |                                   |                                                   |                                            |
|-------------------------------------|-------------------------------|-----------------------------------|---------------------------------------------------|--------------------------------------------|-------------------------------|-----------------------------------|---------------------------------------------------|--------------------------------------------|
|                                     | Number with prescriptions (%) | Total number of prescriptions (%) | Median number of prescriptions <sup>a</sup> (IQR) | Median cumulative dose <sup>ab</sup> (IQR) | Number with prescriptions (%) | Total number of prescriptions (%) | Median number of prescriptions <sup>a</sup> (IQR) | Median cumulative dose <sup>ab</sup> (IQR) |
| <b>Antivertigo/antiemetic drugs</b> |                               |                                   |                                                   |                                            |                               |                                   |                                                   |                                            |
| Cyclizine                           | 1493 (2.5)                    | 7524 (0.8)                        | 1 (1, 2)                                          | 50 (28, 100)                               | 4988 (2.2)                    | 19092 (0.8)                       | 1 (1, 2)                                          | 42 (21, 100)                               |
| Dimenhydrinate                      | 26 (0)                        | 135 (0)                           | 2 (1, 2)                                          | 20 (15, 40)                                | 87 (0)                        | 607 (0)                           | 1 (1, 7)                                          | 20 (20, 138)                               |
| Prochlorperazine                    | 12784 (21.8)                  | 65895 (6.9)                       | 2 (1, 3)                                          | 19 (9, 43)                                 | 45099 (20.0)                  | 211860 (8.5)                      | 1 (1, 3)                                          | 19 (9, 39)                                 |
| Promazine                           | 135 (0.2)                     | 1340 (0.1)                        | 2 (1, 10)                                         | 140 (42, 540)                              | 291 (0.1)                     | 4036 (0.2)                        | 2 (1, 10)                                         | 90 (30, 510)                               |
| Promethazine                        | 587 (1.0)                     | 4779 (0.5)                        | 1 (1, 3)                                          | 21 (11, 56)                                | 1832 (0.8)                    | 13619 (0.5)                       | 1 (1, 3)                                          | 14 (11, 40)                                |
| <b>Antiparkinson drugs</b>          |                               |                                   |                                                   |                                            |                               |                                   |                                                   |                                            |
| Benztropine                         | 7 (0)                         | 212 (0)                           | 26 (1, 64)                                        | 1384 (120, 16128)                          | 8 (0)                         | 61 (0)                            | 2 (1, 15)                                         | 198 (120, 3720)                            |
| Orphenadrine                        | 23 (0)                        | 1068 (0.1)                        | 26 (3, 88)                                        | 448 (30, 1950)                             | 72 (0)                        | 3086 (0.1)                        | 26 (2, 66)                                        | 424 (42, 1273)                             |
| Procyclidine                        | 232 (0.4)                     | 12947 (1.4)                       | 29 (3, 91)                                        | 837 (112, 3395)                            | 366 (0.2)                     | 17788 (0.7)                       | 23 (2, 73)                                        | 589 (67, 2429)                             |
| Trihexyphenidyl                     | 58 (0.1)                      | 2271 (0.2)                        | 10 (1, 58)                                        | 303 (33, 1745)                             | 109 (0.1)                     | 4477 (0.2)                        | 4 (1, 60)                                         | 112 (28, 1560)                             |
| <b>Antipsychotic drugs</b>          |                               |                                   |                                                   |                                            |                               |                                   |                                                   |                                            |
| Chlorpromazine                      | 316 (0.5)                     | 9844 (1.0)                        | 4 (1, 37)                                         | 560 (75, 5483)                             | 628 (0.3)                     | 15035 (0.6)                       | 2 (1, 23)                                         | 147 (70, 2854)                             |
| Clozapine                           | 2 (0)                         | 4 (0)                             | 2 (2, 2)                                          | 250 (75, 425)                              | 4 (0)                         | 25 (0)                            | 3 (1, 12)                                         | 420 (143, 4445)                            |
| Methotrimeprazine                   | 11 (0)                        | 29 (0)                            | 1 (1, 5)                                          | 14 (10, 114)                               | 59 (0)                        | 235 (0)                           | 1 (1, 5)                                          | 28 (10, 84)                                |
| Olanzapine                          | 483 (0.8)                     | 22938 (2.4)                       | 18 (4, 66)                                        | 952 (140, 3080)                            | 726 (0.3)                     | 31710 (1.3)                       | 22 (4, 61)                                        | 896 (168, 3164)                            |
| Pericyazine                         | 17 (0)                        | 460 (0)                           | 2 (1, 44)                                         | 28 (21, 287)                               | 21 (0)                        | 522 (0)                           | 4 (2, 34)                                         | 60 (15, 427)                               |
| Perphenazine                        | 142 (0.2)                     | 4211 (0.4)                        | 16 (2, 53)                                        | 392 (45, 1728)                             | 433 (0.2)                     | 15610 (0.6)                       | 21 (3, 60)                                        | 585 (60, 1880)                             |
| Pimozide                            | 7 (0)                         | 235 (0)                           | 2 (1, 88)                                         | 480 (120, 11516)                           | 17 (0)                        | 747 (0)                           | 20 (1, 54)                                        | 1120 (112, 3996)                           |
| Quetiapine                          | 467 (0.8)                     | 14585 (1.5)                       | 11 (3, 37)                                        | 517 (114, 1800)                            | 447 (0.2)                     | 13092 (0.5)                       | 10 (2, 36)                                        | 504 (112, 2160)                            |
| Thioridazine                        | 325 (0.6)                     | 4550 (0.5)                        | 4 (1, 15)                                         | 336 (70, 1800)                             | 688 (0.3)                     | 7838 (0.3)                        | 3 (1, 11)                                         | 210 (60, 1080)                             |
| Trifluoperazine                     | 419 (0.7)                     | 13039 (1.4)                       | 6 (2, 44)                                         | 960 (172, 8800)                            | 920 (0.4)                     | 24366 (1.0)                       | 5 (1, 39)                                         | 602 (112, 6024)                            |

| Drug name and type                          | Cases (N=58,769)              |                                   |                                                   |                                            | Controls (N=225,574)          |                                   |                                                   |                                            |
|---------------------------------------------|-------------------------------|-----------------------------------|---------------------------------------------------|--------------------------------------------|-------------------------------|-----------------------------------|---------------------------------------------------|--------------------------------------------|
|                                             | Number with prescriptions (%) | Total number of prescriptions (%) | Median number of prescriptions <sup>a</sup> (IQR) | Median cumulative dose <sup>ab</sup> (IQR) | Number with prescriptions (%) | Total number of prescriptions (%) | Median number of prescriptions <sup>a</sup> (IQR) | Median cumulative dose <sup>ab</sup> (IQR) |
| <b>Bladder antimuscarinic drugs</b>         |                               |                                   |                                                   |                                            |                               |                                   |                                                   |                                            |
| Darifenacin                                 | 25 (0)                        | 204 (0)                           | 4 (2, 8)                                          | 112 (56, 280)                              | 87 (0)                        | 652 (0)                           | 3 (1, 7)                                          | 112 (42, 336)                              |
| Fesoterodine                                | 145 (0.3)                     | 1434 (0.2)                        | 3 (1, 11)                                         | 112 (28, 420)                              | 333 (0.2)                     | 2867 (0.1)                        | 3 (1, 9)                                          | 140 (28, 392)                              |
| Flavoxate                                   | 239 (0.4)                     | 2021 (0.2)                        | 1 (1, 4)                                          | 60 (40, 240)                               | 679 (0.3)                     | 5822 (0.2)                        | 1 (1, 4)                                          | 60 (53, 210)                               |
| Oxybutynin                                  | 3632 (6.2)                    | 57685 (6.1)                       | 4 (1, 16)                                         | 120 (30, 601)                              | 9985 (4.4)                    | 132527 (5.3)                      | 2 (1, 12)                                         | 84 (30, 474)                               |
| Propiverine                                 | 173 (0.3)                     | 3080 (0.3)                        | 3 (1, 18)                                         | 224 (56, 1239)                             | 441 (0.2)                     | 6166 (0.2)                        | 2 (1, 13)                                         | 168 (56, 868)                              |
| Solifenacin                                 | 1954 (3.3)                    | 29954 (3.1)                       | 5 (1, 18)                                         | 210 (60, 720)                              | 4859 (2.2)                    | 56883 (2.3)                       | 4 (1, 14)                                         | 148 (30, 600)                              |
| Tolterodine                                 | 3222 (5.5)                    | 68053 (7.1)                       | 5 (1, 25)                                         | 308 (56, 1400)                             | 8691 (3.9)                    | 141899 (5.7)                      | 3 (1, 17)                                         | 196 (56, 1064)                             |
| Trospium                                    | 587 (1.0)                     | 7633 (0.8)                        | 3 (1, 16)                                         | 240 (60, 900)                              | 1483 (0.7)                    | 15861 (0.6)                       | 2 (1, 9)                                          | 120 (60, 600)                              |
| <b>Skeletal muscle relaxants</b>            |                               |                                   |                                                   |                                            |                               |                                   |                                                   |                                            |
| Methocarbamol                               | 418 (0.7)                     | 1105 (0.1)                        | 1 (1, 2)                                          | 23 (16, 42)                                | 1521 (0.7)                    | 4141 (0.2)                        | 1 (1, 2)                                          | 23 (16, 42)                                |
| Tizanidine                                  | 11 (0)                        | 256 (0)                           | 7 (1, 47)                                         | 960 (84, 4200)                             | 53 (0)                        | 1061 (0)                          | 2 (1, 11)                                         | 148 (60, 1120)                             |
| <b>Gastrointestinal antispasmodic drugs</b> |                               |                                   |                                                   |                                            |                               |                                   |                                                   |                                            |
| Alverine                                    | 780 (1.3)                     | 7671 (0.8)                        | 2 (1, 6)                                          | 128 (100, 600)                             | 3077 (1.4)                    | 28730 (1.1)                       | 2 (1, 5)                                          | 144 (100, 500)                             |
| Atropine                                    | 888 (1.5)                     | 4852 (0.5)                        | 1 (1, 2)                                          | 21 (13, 52)                                | 2938 (1.3)                    | 15516 (0.6)                       | 1 (1, 2)                                          | 21 (13, 47)                                |
| Dicyclomine                                 | 979 (1.7)                     | 6749 (0.7)                        | 1 (1, 3)                                          | 15 (6, 44)                                 | 3774 (1.7)                    | 25292 (1.0)                       | 1 (1, 3)                                          | 19 (7, 48)                                 |
| Propantheline                               | 92 (0.2)                      | 1257 (0.1)                        | 1 (1, 11)                                         | 75 (40, 476)                               | 286 (0.1)                     | 2574 (0.1)                        | 1 (1, 6)                                          | 75 (37, 300)                               |
| Scopolamine                                 | 1875 (3.2)                    | 8791 (0.9)                        | 1 (1, 2)                                          | 19 (14, 56)                                | 7506 (3.3)                    | 29156 (1.2)                       | 1 (1, 2)                                          | 19 (13, 37)                                |
| <b>Antiarrhythmic drugs</b>                 |                               |                                   |                                                   |                                            |                               |                                   |                                                   |                                            |
| Disopyramide                                | 49 (0.1)                      | 2569 (0.3)                        | 31 (5, 88)                                        | 882 (175, 2345)                            | 172 (0.1)                     | 8142 (0.3)                        | 37 (5, 77)                                        | 1148 (150, 2436)                           |

| Drug name and type                         | Cases (N=58,769)              |                                   |                                                   |                                            | Controls (N=225,574)          |                                   |                                                   |                                            |
|--------------------------------------------|-------------------------------|-----------------------------------|---------------------------------------------------|--------------------------------------------|-------------------------------|-----------------------------------|---------------------------------------------------|--------------------------------------------|
|                                            | Number with prescriptions (%) | Total number of prescriptions (%) | Median number of prescriptions <sup>a</sup> (IQR) | Median cumulative dose <sup>ab</sup> (IQR) | Number with prescriptions (%) | Total number of prescriptions (%) | Median number of prescriptions <sup>a</sup> (IQR) | Median cumulative dose <sup>ab</sup> (IQR) |
| <b>Antiepileptic drugs</b>                 |                               |                                   |                                                   |                                            |                               |                                   |                                                   |                                            |
| Carbamazepine                              | 1405 (2.4)                    | 40929 (4.3)                       | 4 (1, 39)                                         | 148 (42, 2212)                             | 4479 (2.0)                    | 96884 (3.9)                       | 2 (1, 20)                                         | 80 (30, 959)                               |
| Oxcarbazepine                              | 10 (0)                        | 431 (0)                           | 17 (3, 99)                                        | 536 (38, 4032)                             | 27 (0)                        | 296 (0)                           | 2 (1, 10)                                         | 30 (21, 273)                               |
|                                            |                               |                                   |                                                   |                                            |                               |                                   |                                                   |                                            |
| <b>Antimuscarinic bronchodilator drugs</b> |                               |                                   |                                                   |                                            |                               |                                   |                                                   |                                            |
| Glycopyrrolate                             | 5 (0)                         | 5 (0)                             | 1 (1, 1)                                          | 35 (30, 38)                                | 47 (0)                        | 288 (0)                           | 4 (1, 9)                                          | 167 (38, 360)                              |
| Ipratropium                                | 3877 (6.6)                    | 79878 (8.4)                       | 8 (2, 29)                                         | 300 (60, 1330)                             | 13960 (6.2)                   | 287672 (11.5)                     | 8 (2, 29)                                         | 331 (67, 1333)                             |

<sup>a</sup> In patients with one or more prescriptions for drug

<sup>b</sup> Cumulative dose calculated using total standardized daily doses (TSDDs) in exposure window.

eTable 4 Numbers of cases and controls prescribed different types of anticholinergic drugs in the 3 to 13 years before the index date

| Anticholinergic drug group           | Cases<br>(N=45,621)           |                         |                                                   |                                            | Controls<br>(N=169,020)       |                         |                                                   |                                            |
|--------------------------------------|-------------------------------|-------------------------|---------------------------------------------------|--------------------------------------------|-------------------------------|-------------------------|---------------------------------------------------|--------------------------------------------|
|                                      | Number with prescriptions (%) | Total prescriptions (%) | Median number of prescriptions <sup>a</sup> (IQR) | Median cumulative dose <sup>ab</sup> (IQR) | Number with prescriptions (%) | Total prescriptions (%) | Median number of prescriptions <sup>a</sup> (IQR) | Median cumulative dose <sup>ab</sup> (IQR) |
| Any anticholinergic drugs            | 25076 (55.0)                  | 626166 (100)            | 5 (2, 28)                                         | 185 (40, 1350)                             | 84344 (49.9)                  | 1657509 (100)           | 4 (1, 19)                                         | 126 (30, 865)                              |
| Antihistamines                       | 4943 (10.8)                   | 23546 (3.8)             | 1 (1, 2)                                          | 30 (25, 81)                                | 17078 (10.1)                  | 75272 (4.5)             | 1 (1, 2)                                          | 30 (22, 77)                                |
| Antidepressants                      | 12225 (26.8)                  | 293940 (46.9)           | 5 (1, 31)                                         | 280 (65, 1764)                             | 38539 (22.8)                  | 773224 (46.6)           | 4 (1, 23)                                         | 196 (56, 1268)                             |
| Antivertigo/antiemetic drugs         | 10536 (23.1)                  | 54361 (8.7)             | 2 (1, 3)                                          | 20 (9, 56)                                 | 35918 (21.3)                  | 170113 (10.3)           | 1 (1, 3)                                          | 18.67 (9, 48)                              |
| Antiparkinson agents                 | 222 (0.5)                     | 10902 (1.7)             | 26 (3, 78)                                        | 690 (75, 3127)                             | 415 (0.2)                     | 18545 (1.1)             | 16 (2, 69)                                        | 504 (43, 2244)                             |
| Antipsychotic drugs                  | 1223 (2.7)                    | 42542 (6.8)             | 9 (2, 50)                                         | 708 (112, 4480)                            | 2721 (1.6)                    | 74266 (4.5)             | 6 (1, 38)                                         | 420 (80, 2590)                             |
| Bladder antimuscarinic drugs         | 4578 (10.0)                   | 92406 (14.8)            | 6 (2, 25)                                         | 252 (56, 1241)                             | 12352 (7.3)                   | 204732 (12.4)           | 4 (1, 19)                                         | 168 (56, 952)                              |
| Skeletal muscle relaxants            | 355 (0.8)                     | 969 (0.2)               | 1 (1, 2)                                          | 30 (16, 42)                                | 1224 (0.7)                    | 3630 (0.2)              | 1 (1, 2)                                          | 22.5 (16, 42)                              |
| Gastrointestinal antispasmodic drugs | 3205 (7.0)                    | 21579 (3.4)             | 1 (1, 4)                                          | 30 (13, 120)                               | 11365 (6.7)                   | 70133 (4.2)             | 1 (1, 3)                                          | 28 (13, 112)                               |
| Antiarrhythmic drugs                 | 41 (0.1)                      | 2007 (0.3)              | 36 (11, 74)                                       | 1320 (330, 2044)                           | 143 (0.1)                     | 6413 (0.4)              | 34 (4, 73)                                        | 1020 (105, 2478)                           |
| Antiepileptic drugs                  | 1140 (2.5)                    | 26150 (4.2)             | 3 (1, 29)                                         | 112 (42, 1652)                             | 3408 (2)                      | 64233 (3.9)             | 2 (1, 15)                                         | 84 (30, 777)                               |
| Antimuscarinic bronchodilator drugs  | 2922 (6.4)                    | 57764 (9.2)             | 8 (2, 27)                                         | 300 (63, 1262)                             | 9999 (5.9)                    | 196948 (11.9)           | 7 (2, 28)                                         | 300 (60, 1267)                             |

<sup>a</sup> In patients with one or more prescriptions for drug

<sup>b</sup> Cumulative dose calculated using total standardised daily doses (TSDDs) in exposure window.

eTable 5 Numbers of cases and controls prescribed different types of anticholinergic drugs in the 5 to 20 years before the index date

| Anticholinergic drug group           | Cases (N=8,283)               |                         |                                                   |                                            | Controls (N=27,200)           |                         |                                                   |                                            |
|--------------------------------------|-------------------------------|-------------------------|---------------------------------------------------|--------------------------------------------|-------------------------------|-------------------------|---------------------------------------------------|--------------------------------------------|
|                                      | Number with prescriptions (%) | Total prescriptions (%) | Median number of prescriptions <sup>a</sup> (IQR) | Median cumulative dose <sup>ab</sup> (IQR) | Number with prescriptions (%) | Total prescriptions (%) | Median number of prescriptions <sup>a</sup> (IQR) | Median cumulative dose <sup>ab</sup> (IQR) |
| Any anticholinergic drugs            | 4948 (59.7)                   | 129441 (100)            | 5 (2, 26)                                         | 189 (40, 1269)                             | 14919 (54.8)                  | 318689 (100)            | 4 (1, 18)                                         | 130 (30, 822)                              |
| Antihistamines                       | 1200 (14.5)                   | 5157 (4.0)              | 1 (1, 2)                                          | 30 (27, 84)                                | 3445 (12.7)                   | 14727 (4.6)             | 1 (1, 2)                                          | 30 (24, 75)                                |
| Antidepressants                      | 2512 (30.3)                   | 64561 (49.9)            | 5 (2, 29)                                         | 300 (70, 1810)                             | 6988 (25.7)                   | 154150 (48.4)           | 4 (1, 22)                                         | 225 (70, 1344)                             |
| Antivertigo/antiemetic drugs         | 2267 (27.4)                   | 11832 (9.1)             | 2 (1, 4)                                          | 19 (9, 49)                                 | 6863 (25.2)                   | 33528 (10.5)            | 2 (1, 3)                                          | 19 (9, 47)                                 |
| Antiparkinson drugs                  | 48 (0.6)                      | 1723 (1.3)              | 9 (2, 58)                                         | 261 (58, 2053)                             | 89 (0.3)                      | 4538 (1.4)              | 19 (2, 76)                                        | 536 (67, 2769)                             |
| Antipsychotic drugs                  | 278 (3.4)                     | 9053 (7.0)              | 8 (1, 40)                                         | 577 (80, 3422)                             | 684 (2.5)                     | 19014 (6)               | 3 (1, 25)                                         | 240 (60, 2415)                             |
| Bladder antimuscarinic drugs         | 831 (10)                      | 14715 (11.4)            | 5 (2, 20)                                         | 240 (57, 1080)                             | 2022 (7.4)                    | 32973 (10.3)            | 4 (1, 17)                                         | 164 (56, 840)                              |
| Skeletal muscle relaxants            | 97 (1.2)                      | 201 (0.2)               | 1 (1, 2)                                          | 30 (19, 42)                                | 251 (0.9)                     | 565 (0.2)               | 1 (1, 2)                                          | 23 (19, 38)                                |
| Gastrointestinal antispasmodic drugs | 787 (9.5)                     | 4868 (3.8)              | 1 (1, 3)                                          | 28 (13, 100)                               | 2300 (8.5)                    | 12339 (3.9)             | 1 (1, 3)                                          | 26 (13, 100)                               |
| Antiarrhythmic drugs                 | 11 (0.1)                      | 598 (0.5)               | 36 (1, 98)                                        | 1152 (21, 4564)                            | 25 (0.1)                      | 1412 (0.4)              | 53 (2, 81)                                        | 2029 (45, 3645)                            |
| Antiepileptic drugs                  | 228 (2.8)                     | 5291 (4.1)              | 2 (1, 24)                                         | 84 (33, 1796)                              | 684 (2.5)                     | 11202 (3.5)             | 2 (1, 8)                                          | 69 (30, 425)                               |
| Antimuscarinic bronchodilator drugs  | 538 (6.5)                     | 11442 (8.8)             | 6 (1, 27)                                         | 221 (60, 1157)                             | 1670 (6.1)                    | 34241 (10.7)            | 1 (1, 2)                                          | 30 (24, 75)                                |

<sup>a</sup> In patients with one or more prescriptions for drug

<sup>b</sup> Cumulative dose calculated using total standardised daily doses (TSDDs) in exposure window.

eTable 6 Adjusted odds ratios for cumulative use of anticholinergic drug types in the 1 to 11, 3 to 13 and 5 to 20 years before the index date

| Anticholinergic drug type           | 1 to 11 years before index date  |                | 3 to 13 years before index date  |                | 5 to 20 years before index date |                |
|-------------------------------------|----------------------------------|----------------|----------------------------------|----------------|---------------------------------|----------------|
|                                     | Cases=58,769<br>Controls=225,574 |                | Cases=45,621<br>Controls=169,020 |                | Cases=8,283<br>Controls=27,200  |                |
|                                     | OR <sup>a</sup>                  | 95% CI         | OR <sup>a</sup>                  | 95% CI         | OR <sup>a</sup>                 | 95% CI         |
| <b>Antihistamines</b>               |                                  |                |                                  |                |                                 |                |
| Non-use                             | 1.00                             |                | 1.00                             |                | 1.00                            |                |
| 1-90 TSDDs                          | 1.03                             | (0.99 to 1.07) | 1.04                             | (0.99 to 1.08) | 1.09 <sup>b</sup>               | (1.01 to 1.18) |
| 91-365 TSDDs                        | 1.03                             | (0.95 to 1.12) | 0.98                             | (0.89 to 1.07) |                                 |                |
| 366-1095 TSDDs                      | 1.02                             | (0.88 to 1.18) | 1.03                             | (0.87 to 1.22) |                                 |                |
| >1095 TSDDs                         | 1.14                             | (0.98 to 1.34) | 1.18                             | (0.97 to 1.43) |                                 |                |
| <b>Antidepressants</b>              |                                  |                |                                  |                |                                 |                |
| Non-use                             | 1.00                             |                | 1.00                             |                | 1.00                            |                |
| 1-90 TSDDs                          | 1.02                             | (0.98 to 1.06) | 1.06                             | (1.01 to 1.10) | 1.11                            | (1.01 to 1.23) |
| 91-365 TSDDs                        | 1.12                             | (1.07 to 1.17) | 1.13                             | (1.08 to 1.19) | 1.14                            | (1.02 to 1.27) |
| 366-1095 TSDDs                      | 1.25                             | (1.18 to 1.32) | 1.21                             | (1.13 to 1.29) | 1.20                            | (1.05 to 1.37) |
| >1095 TSDDs                         | 1.29                             | (1.24 to 1.34) | 1.31                             | (1.25 to 1.38) | 1.33                            | (1.20 to 1.48) |
| <b>Antivertigo/antiemetic drugs</b> |                                  |                |                                  |                |                                 |                |
| Non-use                             | 1.00                             |                | 1.00                             |                | 1.00                            |                |
| 1-90 TSDDs                          | 1.05                             | (1.02 to 1.08) | 1.04                             | (1.01 to 1.07) | 1.05 <sup>b</sup>               | (0.98 to 1.11) |
| 91-365 TSDDs                        | 1.14                             | (1.07 to 1.21) | 1.15                             | (1.07 to 1.24) |                                 |                |
| 366-1095 TSDDs                      | 1.41                             | (1.27 to 1.56) | 1.21                             | (1.06 to 1.38) |                                 |                |
| >1095 TSDDs                         | 1.08                             | (0.94 to 1.24) | 1.02                             | (0.86 to 1.20) |                                 |                |
| <b>Antiparkinson drugs</b>          |                                  |                |                                  |                |                                 |                |
| Non-use                             | 1.00                             |                | 1.00                             |                | 1.00                            |                |
| 1-90 TSDDs                          | 1.01                             | (0.73 to 1.39) | 1.24                             | (0.89 to 1.73) | 1.30 <sup>b</sup>               | (0.84 to 2.01) |
| 91-365 TSDDs                        | 1.68                             | (1.09 to 2.58) | 1.54                             | (0.93 to 2.56) |                                 |                |
| 366-1095 TSDDs                      | 1.03                             | (0.66 to 1.61) | 1.29                             | (0.74 to 2.24) |                                 |                |
| >1095 TSDDs                         | 1.52                             | (1.16 to 2.00) | 1.56                             | (1.16 to 2.11) |                                 |                |
| <b>Antipsychotics</b>               |                                  |                |                                  |                |                                 |                |
| Non-use                             | 1.00                             |                | 1.00                             |                | 1.00                            |                |
| 1-90 TSDDs                          | 1.44                             | (1.25 to 1.66) | 1.16                             | (0.99 to 1.36) | 0.95                            | (0.70 to 1.27) |
| 91-365 TSDDs                        | 1.41                             | (1.21 to 1.65) | 1.22                             | (1.03 to 1.45) | 0.88                            | (0.62 to 1.24) |
| 366-1095 TSDDs                      | 2.09                             | (1.76 to 2.47) | 1.64                             | (1.33 to 2.01) | 1.37                            | (0.90 to 2.08) |
| >1095 TSDDs                         | 1.70                             | (1.53 to 1.90) | 1.42                             | (1.25 to 1.61) | 1.23                            | (0.93 to 1.62) |
| <b>Bladder antimuscarinics</b>      |                                  |                |                                  |                |                                 |                |
| Non-use                             | 1.00                             |                | 1.00                             |                | 1.00                            |                |
| 1-90 TSDDs                          | 1.19                             | (1.13 to 1.26) | 1.18                             | (1.11 to 1.26) | 1.06                            | (0.91 to 1.23) |
| 91-365 TSDDs                        | 1.35                             | (1.27 to 1.45) | 1.33                             | (1.22 to 1.44) | 1.35                            | (1.12 to 1.63) |
| 366-1095 TSDDs                      | 1.65                             | (1.53 to 1.78) | 1.55                             | (1.41 to 1.70) | 1.48                            | (1.20 to 1.83) |
| >1095 TSDDs                         | 1.65                             | (1.56 to 1.75) | 1.57                             | (1.46 to 1.69) | 1.55                            | (1.29 to 1.86) |
| <b>Skeletal muscle relaxants</b>    |                                  |                |                                  |                |                                 |                |
| Non-use                             | 1.00                             |                | 1.00                             |                | 1.00                            |                |
| 1-90 TSDDs                          | 0.98                             | (0.86 to 1.11) | 1.01                             | (0.88 to 1.16) | 1.24 <sup>b</sup>               | (0.95 to 1.61) |
| 91-365 TSDDs                        | 1.12                             | (0.77 to 1.65) | 1.14                             | (0.72 to 1.80) |                                 |                |

|                                        |      |                |      |                |                   |                |
|----------------------------------------|------|----------------|------|----------------|-------------------|----------------|
| 366-1095 TSDDs                         | 0.99 | (0.46 to 2.10) | 1.16 | (0.50 to 2.68) |                   |                |
| >1095 TSDDs                            | 1.10 | (0.47 to 2.55) | 1.03 | (0.37 to 2.90) |                   |                |
| <b>Gastrointestinal antispasmodics</b> |      |                |      |                |                   |                |
| Non-use                                | 1.00 |                | 1.00 |                | 1.00              |                |
| 1-90 TSDDs                             | 0.90 | (0.85 to 0.94) | 0.94 | (0.89 to 0.99) | 1.04 <sup>b</sup> | (0.95 to 1.15) |
| 91-365 TSDDs                           | 0.93 | (0.85 to 1.02) | 1.03 | (0.93 to 1.14) |                   |                |
| 366-1095 TSDDs                         | 0.93 | (0.80 to 1.09) | 0.98 | (0.83 to 1.17) |                   |                |
| >1095 TSDDs                            | 1.04 | (0.90 to 1.20) | 1.06 | (0.90 to 1.26) |                   |                |
| <b>Antiarrhythmics</b>                 |      |                |      |                |                   |                |
| Non-use                                | 1.00 |                | 1.00 |                | 1.00              |                |
| 1-90 TSDDs                             | 0.74 | (0.33 to 1.64) | 0.80 | (0.34 to 1.90) | 1.30 <sup>b</sup> | (0.60 to 2.80) |
| 91-365 TSDDs                           | 1.25 | (0.44 to 3.53) | 1.17 | (0.37 to 3.73) |                   |                |
| 366-1095 TSDDs                         | 1.22 | (0.56 to 2.66) | 0.97 | (0.40 to 2.35) |                   |                |
| >1095 TSDDs                            | 0.94 | (0.56 to 1.55) | 1.17 | (0.70 to 1.96) |                   |                |
| <b>Antiepileptics</b>                  |      |                |      |                |                   |                |
| Non-use                                | 1.00 |                | 1.00 |                | 1.00              |                |
| 1-90 TSDDs                             | 0.88 | (0.80 to 0.97) | 0.95 | (0.86 to 1.06) | 0.85              | (0.68 to 1.08) |
| 91-365 TSDDs                           | 1.14 | (0.95 to 1.36) | 1.00 | (0.82 to 1.21) | 0.70              | (0.45 to 1.11) |
| 366-1095 TSDDs                         | 1.13 | (0.90 to 1.41) | 1.19 | (0.93 to 1.53) | 0.69              | (0.38 to 1.25) |
| >1095 TSDDs                            | 1.39 | (1.22 to 1.57) | 1.37 | (1.18 to 1.59) | 1.66              | (1.19 to 2.31) |
| <b>Antimuscarinic bronchodilators</b>  |      |                |      |                |                   |                |
| Non-use                                | 1.00 |                | 1.00 |                | 1.00              |                |
| 1-90 TSDDs                             | 0.99 | (0.92 to 1.07) | 0.97 | (0.89 to 1.05) | 0.88              | (0.73 to 1.06) |
| 91-365 TSDDs                           | 0.97 | (0.89 to 1.06) | 1.02 | (0.92 to 1.12) | 0.85              | (0.69 to 1.06) |
| 366-1095 TSDDs                         | 0.97 | (0.88 to 1.06) | 0.95 | (0.86 to 1.06) | 1.12              | (0.86 to 1.45) |
| >1095 TSDDs                            | 0.97 | (0.90 to 1.05) | 1.03 | (0.94 to 1.13) | 0.96              | (0.78 to 1.19) |

TSDD = total standardised daily dose

<sup>a</sup> Adjusted for other anticholinergic drug types, body mass index, smoking status, alcohol consumption, Townsend deprivation score, ethnic group, coronary heart disease, atrial fibrillation, heart failure, hypertension, hyperlipidaemia, diabetes (type 1 and type 2), stroke, transient ischaemic attack, subarachnoid haemorrhage, renal disease, asthma, chronic obstructive pulmonary disease, anxiety, depression, bipolar disorder, schizophrenia, severe head injury, cognitive decline/memory loss, antihypertensive drugs, aspirin, hypnotics, anxiolytic drugs, NSAIDs, statins and matching by age, sex, practice and calendar time.

<sup>b</sup> Any use of drug group (exposure categories combined into any use or no use due to small numbers)



eTable 7 Numbers of cases and controls prescribed anticholinergic drug types in the 1 to 11, 3 to 13 and 5 to 20 years before the index date

| Category                            | 1 to 11 years before index date  |               | 3 to 13 years before index date  |               | 5 to 20 years before index date |              |
|-------------------------------------|----------------------------------|---------------|----------------------------------|---------------|---------------------------------|--------------|
|                                     | Cases=58,769<br>Controls=225,574 |               | Cases=45,621<br>Controls=169,020 |               | Cases=8,283<br>Controls=27,200  |              |
|                                     | Cases                            | Controls      | Cases                            | Controls      | Cases                           | Controls     |
|                                     | N (%)                            | N (%)         | N (%)                            | N (%)         | N (%)                           | N (%)        |
| <b>Antihistamines</b>               |                                  |               |                                  |               |                                 |              |
| Non-use                             | 52312 (89.0)                     | 202429 (89.7) | 40678 (89.2)                     | 151942 (89.9) | 7083 (85.5)                     | 23755 (87.3) |
| 1-90 TSDDs                          | 4987 (8.5)                       | 18187 (8.1)   | 3890 (8.5)                       | 13547 (8)     | 927 (11.2)                      | 2730 (10)    |
| 91-365 TSDDs                        | 923 (1.6)                        | 3105 (1.4)    | 662 (1.5)                        | 2268 (1.3)    | 189 (2.3)                       | 484 (1.8)    |
| 366-1095 TSDDs                      | 280 (0.5)                        | 1022 (0.5)    | 216 (0.5)                        | 727 (0.4)     | 51 (0.6)                        | 127 (0.5)    |
| >1095 TSDDs                         | 267 (0.5)                        | 831 (0.4)     | 175 (0.4)                        | 536 (0.3)     | 33 (0.4)                        | 104 (0.4)    |
|                                     |                                  |               |                                  |               |                                 |              |
| <b>Antidepressants</b>              |                                  |               |                                  |               |                                 |              |
| Non-use                             | 42831 (72.9)                     | 173014 (76.7) | 33396 (73.2)                     | 130481 (77.2) | 5771 (69.7)                     | 20212 (74.3) |
| 1-90 TSDDs                          | 5098 (8.7)                       | 19402 (8.6)   | 3903 (8.6)                       | 13840 (8.2)   | 742 (9)                         | 2239 (8.2)   |
| 91-365 TSDDs                        | 3463 (5.9)                       | 11931 (5.3)   | 2760 (6.1)                       | 9142 (5.4)    | 600 (7.2)                       | 1829 (6.7)   |
| 366-1095 TSDDs                      | 2227 (3.8)                       | 6749 (3.0)    | 1721 (3.8)                       | 5209 (3.1)    | 386 (4.7)                       | 1023 (3.8)   |
| >1095 TSDDs                         | 5150 (8.8)                       | 14478 (6.4)   | 3841 (8.4)                       | 10348 (6.1)   | 784 (9.5)                       | 1897 (7)     |
|                                     |                                  |               |                                  |               |                                 |              |
| <b>Antivertigo/<br/>antiemetics</b> |                                  |               |                                  |               |                                 |              |
| Non-use                             | 44800 (76.2)                     | 176584 (78.3) | 35085 (76.9)                     | 133102 (78.8) | 6016 (72.6)                     | 20337 (74.8) |
| 1-90 TSDDs                          | 11427 (19.4)                     | 41159 (18.3)  | 8745 (19.2)                      | 30489 (18)    | 1894 (22.9)                     | 5874 (21.6)  |
| 91-365 TSDDs                        | 1574 (2.7)                       | 5026 (2.2)    | 1167 (2.6)                       | 3526 (2.1)    | 247 (3)                         | 634 (2.3)    |
| 366-1095 TSDDs                      | 617 (1.1)                        | 1659 (0.7)    | 382 (0.8)                        | 1111 (0.7)    | 82 (1)                          | 194 (0.7)    |
| >1095 TSDDs                         | 351 (0.6)                        | 1146 (0.5)    | 242 (0.5)                        | 792 (0.5)     | 44 (0.5)                        | 161 (0.6)    |
|                                     |                                  |               |                                  |               |                                 |              |
|                                     |                                  |               |                                  |               |                                 |              |

|                                        |              |               |              |               |             |              |
|----------------------------------------|--------------|---------------|--------------|---------------|-------------|--------------|
| <b>Antiparkinson drugs</b>             |              |               |              |               |             |              |
| Non-use                                | 58477 (99.5) | 225047 (99.8) | 45399 (99.5) | 168605 (99.8) | 8235 (99.4) | 27111 (99.7) |
| 1-90 TSDDs                             | 68 (0.1)     | 179 (0.1)     | 58 (0.1)     | 147 (0.1)     | 15 (0.2)    | 29 (0.1)     |
| 91-365 TSDDs                           | 50 (0.1)     | 59 (0)        | 34 (0.1)     | 47 (0)        | 11 (0.1)    | 14 (0.1)     |
| 366-1095 TSDDs                         | 39 (0.1)     | 71 (0)        | 27 (0.1)     | 51 (0)        | 6 (0.1)     | 11 (0)       |
| >1095 TSDDs                            | 135 (0.2)    | 218 (0.1)     | 103 (0.2)    | 170 (0.1)     | 16 (0.2)    | 35 (0.1)     |
|                                        |              |               |              |               |             |              |
| <b>Antipsychotics</b>                  |              |               |              |               |             |              |
| Non-use                                | 56957 (96.9) | 222174 (98.5) | 44398 (97.3) | 166299 (98.4) | 8005 (96.6) | 26516 (97.5) |
| 1-90 TSDDs                             | 388 (0.7)    | 882 (0.4)     | 269 (0.6)    | 737 (0.4)     | 73 (0.9)    | 225 (0.8)    |
| 91-365 TSDDs                           | 332 (0.6)    | 695 (0.3)     | 238 (0.5)    | 593 (0.4)     | 48 (0.6)    | 162 (0.6)    |
| 366-1095 TSDDs                         | 304 (0.5)    | 490 (0.2)     | 178 (0.4)    | 369 (0.2)     | 42 (0.5)    | 74 (0.3)     |
| >1095 TSDDs                            | 788 (1.3)    | 1333 (0.6)    | 538 (1.2)    | 1022 (0.6)    | 115 (1.4)   | 223 (0.8)    |
|                                        |              |               |              |               |             |              |
| <b>Bladder antimuscarinics</b>         |              |               |              |               |             |              |
| Non-use                                | 51905 (88.3) | 206796 (91.7) | 41043 (90.0) | 156668 (92.7) | 7452 (90)   | 25178 (92.6) |
| 1-90 TSDDs                             | 2139 (3.6)   | 7005 (3.1)    | 1515 (3.3)   | 4798 (2.8)    | 281 (3.4)   | 834 (3.1)    |
| 91-365 TSDDs                           | 1417 (2.4)   | 4078 (1.8)    | 1030 (2.3)   | 2834 (1.7)    | 195 (2.4)   | 441 (1.6)    |
| 366-1095 TSDDs                         | 1244 (2.1)   | 2941 (1.3)    | 789 (1.7)    | 1855 (1.1)    | 149 (1.8)   | 309 (1.1)    |
| >1095 TSDDs                            | 2064 (3.5)   | 4754 (2.1)    | 1244 (2.7)   | 2865 (1.7)    | 206 (2.5)   | 438 (1.6)    |
|                                        |              |               |              |               |             |              |
| <b>Skeletal muscle relaxants</b>       |              |               |              |               |             |              |
| Non-use                                | 58340 (99.3) | 224006 (99.3) | 45266 (99.2) | 167796 (99.3) | 8186 (98.8) | 26949 (99.1) |
| 1-90 TSDDs                             | 372 (0.6)    | 1380 (0.6)    | 315 (0.7)    | 1089 (0.6)    | 86 (1.0)    | 228 (0.8)    |
| 91-365 TSDDs                           | 39 (0.1)     | 115 (0.1)     | 27 (0.1)     | 88 (0.1)      | 9 (0.1)     | 16 (0.1)     |
| 366-1095 TSDDs                         | 9 (0)        | 41 (0)        | 8 (0)        | 24 (0)        | ≤5 (0)      | 6 (0)        |
| >1095 TSDDs                            | 9 (0)        | 32 (0)        | ≤5 (0)       | 23 (0)        | ≤5 (0)      | ≤5 (0)       |
|                                        |              |               |              |               |             |              |
| <b>Gastrointestinal antispasmodics</b> |              |               |              |               |             |              |
| Non-use                                | 54733 (93.1) | 210093 (93.1) | 42416 (93)   | 157655 (93.3) | 7496 (90.5) | 24900 (91.5) |

|                                       |              |               |              |               |             |              |
|---------------------------------------|--------------|---------------|--------------|---------------|-------------|--------------|
| 1-90 TSDDs                            | 2765 (4.7)   | 10914 (4.8)   | 2192 (4.8)   | 8015 (4.7)    | 565 (6.8)   | 1656 (6.1)   |
| 91-365 TSDDs                          | 722 (1.2)    | 2686 (1.2)    | 592 (1.3)    | 1997 (1.2)    | 137 (1.7)   | 396 (1.5)    |
| 366-1095 TSDDs                        | 267 (0.5)    | 938 (0.4)     | 217 (0.5)    | 695 (0.4)     | 42 (0.5)    | 138 (0.5)    |
| >1095 TSDDs                           | 282 (0.5)    | 943 (0.4)     | 204 (0.5)    | 658 (0.4)     | 43 (0.5)    | 110 (0.4)    |
|                                       |              |               |              |               |             |              |
| <b>Antiarrhythmic drugs</b>           |              |               |              |               |             |              |
| Non-use                               | 58720 (99.9) | 225402 (99.9) | 45580 (99.9) | 168877 (99.9) | 8272 (99.9) | 27175 (99.9) |
| 1-90 TSDDs                            | 9 (0)        | 37 (0)        | 7 (0)        | 32 (0)        | ≤5 (0)      | 8 (0)        |
| 91-365 TSDDs                          | 7 (0)        | 20 (0)        | ≤5 (0)       | 17 (0)        | ≤5 (0)      | ≤5 (0)       |
| 366-1095 TSDDs                        | 10 (0)       | 27 (0)        | 7 (0)        | 24 (0)        | ≤5 (0)      | ≤5 (0)       |
| >1095 TSDDs                           | 23 (0)       | 88 (0)        | 23 (0.1)     | 70 (0)        | 6 (0.1)     | 14 (0.1)     |
|                                       |              |               |              |               |             |              |
| <b>Antiepileptics</b>                 |              |               |              |               |             |              |
| Non-use                               | 57358 (97.6) | 221082 (98)   | 44481 (97.5) | 165612 (98)   | 117 (1.4)   | 26516 (97.5) |
| 1-90 TSDDs                            | 630 (1.1)    | 2459 (1.1)    | 549 (1.2)    | 1864 (1.1)    | 30 (0.4)    | 392 (1.4)    |
| 91-365 TSDDs                          | 202 (0.3)    | 592 (0.3)     | 167 (0.4)    | 504 (0.3)     | 15 (0.2)    | 107 (0.4)    |
| 366-1095 TSDDs                        | 135 (0.2)    | 359 (0.2)     | 106 (0.2)    | 274 (0.2)     | 10 (0.1)    | 65 (0.2)     |
| >1095 TSDDs                           | 444 (0.8)    | 1082 (0.5)    | 318 (0.7)    | 766 (0.5)     | 66 (0.8)    | 120 (0.4)    |
|                                       |              |               |              |               |             |              |
| <b>Antimuscarinic bronchodilators</b> |              |               |              |               |             |              |
| Non-use                               | 54891 (93.4) | 211578 (93.8) | 42699 (93.6) | 159021 (94.1) | 185 (2.2)   | 25530 (93.9) |
| 1-90 TSDDs                            | 1228 (2.1)   | 4326 (1.9)    | 921 (2)      | 3172 (1.9)    | 124 (1.5)   | 588 (2.2)    |
| 91-365 TSDDs                          | 786 (1.3)    | 2885 (1.3)    | 628 (1.4)    | 2135 (1.3)    | 90 (1.1)    | 399 (1.5)    |
| 366-1095 TSDDs                        | 742 (1.3)    | 2719 (1.2)    | 542 (1.2)    | 1925 (1.1)    | 39 (0.5)    | 246 (0.9)    |
| >1095 TSDDs                           | 1122 (1.9)   | 4066 (1.8)    | 831 (1.8)    | 2767 (1.6)    | 139 (1.7)   | 437 (1.6)    |
|                                       |              |               |              |               |             |              |

eTable 8 Adjusted odds ratios for cumulative use of anticholinergic drugs in the 1 to 11 years before index date: separate analyses in cases aged less than 80 at diagnosis of dementia and cases aged 80 and over at diagnosis, with their matched controls

| Exposure category                | Aged <80 at index date:<br>Cases= 18,302<br>Controls= 72,000 |                | Aged ≥80 at index date:<br>Cases= 40,467<br>Controls= 153,574 |                |
|----------------------------------|--------------------------------------------------------------|----------------|---------------------------------------------------------------|----------------|
|                                  | Adjusted <sup>a</sup>                                        |                | Adjusted <sup>a</sup>                                         |                |
|                                  | OR                                                           | 95% CI         | OR                                                            | 95% CI         |
| <b>Cumulative use: all drugs</b> |                                                              |                |                                                               |                |
| Non-use                          | 1.00                                                         |                | 1.00                                                          |                |
| 1-90 TSDDs                       | 1.07                                                         | (1.02 to 1.13) | 1.05                                                          | (1.02 to 1.08) |
| 91-365 TSDDs                     | 1.32                                                         | (1.24 to 1.41) | 1.10                                                          | (1.05 to 1.14) |
| 366-1095 TSDDs                   | 1.53                                                         | (1.42 to 1.65) | 1.28                                                          | (1.22 to 1.35) |
| >1095 TSDDs                      | 1.81                                                         | (1.71 to 1.91) | 1.35                                                          | (1.30 to 1.40) |
|                                  |                                                              |                |                                                               |                |
| <b>Antihistamines</b>            |                                                              |                |                                                               |                |
| Non-use                          | 1.00                                                         |                | 1.00                                                          |                |
| 1-90 TSDDs                       | 1.11                                                         | (1.04 to 1.18) | 0.99                                                          | (0.95 to 1.03) |
| 91-365 TSDDs                     | 0.99                                                         | (0.85 to 1.16) | 1.04                                                          | (0.94 to 1.14) |
| 366-1095 TSDDs                   | 0.98                                                         | (0.74 to 1.30) | 1.02                                                          | (0.86 to 1.21) |
| >1095 TSDDs                      | 1.41                                                         | (1.08 to 1.86) | 1.02                                                          | (0.84 to 1.24) |
|                                  |                                                              |                |                                                               |                |
| <b>Antidepressants</b>           |                                                              |                |                                                               |                |
| Non-use                          | 1.00                                                         |                | 1.00                                                          |                |
| 1-90 TSDDs                       | 1.04                                                         | (0.97 to 1.11) | 1.01                                                          | (0.96 to 1.05) |
| 91-365 TSDDs                     | 1.27                                                         | (1.17 to 1.37) | 1.06                                                          | (1.00 to 1.12) |
| 366-1095 TSDDs                   | 1.34                                                         | (1.21 to 1.47) | 1.21                                                          | (1.13 to 1.29) |
| >1095 TSDDs                      | 1.47                                                         | (1.37 to 1.57) | 1.20                                                          | (1.14 to 1.26) |
|                                  |                                                              |                |                                                               |                |
| <b>Antivertigo/antiemetics</b>   |                                                              |                |                                                               |                |
| Non-use                          | 1.00                                                         |                | 1.00                                                          |                |
| 1-90 TSDDs                       | 1.10                                                         | (1.05 to 1.16) | 1.03                                                          | (0.99 to 1.06) |
| 91-365 TSDDs                     | 1.25                                                         | (1.10 to 1.41) | 1.10                                                          | (1.02 to 1.19) |
| 366-1095 TSDDs                   | 1.72                                                         | (1.39 to 2.13) | 1.33                                                          | (1.18 to 1.50) |
| >1095 TSDDs                      | 1.27                                                         | (0.97 to 1.67) | 1.02                                                          | (0.87 to 1.19) |
|                                  |                                                              |                |                                                               |                |
| <b>Antiparkinson agents</b>      |                                                              |                |                                                               |                |
| Non-use                          | 1.00                                                         |                | 1.00                                                          |                |
| 1-90 TSDDs                       | 1.24                                                         | (0.75 to 2.07) | 0.86                                                          | (0.56 to 1.32) |
| 91-365 TSDDs                     | 1.91                                                         | (1.06 to 3.45) | 1.31                                                          | (0.68 to 2.50) |
| 366-1095 TSDDs                   | 1.19                                                         | (0.62 to 2.26) | 0.89                                                          | (0.46 to 1.71) |
| >1095 TSDDs                      | 1.70                                                         | (1.18 to 2.45) | 1.21                                                          | (0.80 to 1.84) |
|                                  |                                                              |                |                                                               |                |
| <b>Antipsychotics</b>            |                                                              |                |                                                               |                |
| Non-use                          | 1.00                                                         |                | 1.00                                                          |                |
| 1-90 TSDDs                       | 1.32                                                         | (1.03 to 1.7)  | 1.48                                                          | (1.25 to 1.75) |
| 91-365 TSDDs                     | 1.58                                                         | (1.22 to 2.06) | 1.32                                                          | (1.09 to 1.60) |
| 366-1095 TSDDs                   | 2.74                                                         | (2.05 to 3.66) | 1.82                                                          | (1.48 to 2.25) |
| >1095 TSDDs                      | 2.13                                                         | (1.79 to 2.53) | 1.44                                                          | (1.25 to 1.66) |
|                                  |                                                              |                |                                                               |                |

|                                        |      |                |      |                |
|----------------------------------------|------|----------------|------|----------------|
| <b>Bladder antimuscarinics</b>         |      |                |      |                |
| Non-use                                | 1.00 |                | 1.00 |                |
| 1-90 TSDDs                             | 1.22 | (1.10 to 1.37) | 1.19 | (1.12 to 1.27) |
| 91-365 TSDDs                           | 1.46 | (1.28 to 1.66) | 1.32 | (1.22 to 1.43) |
| 366-1095 TSDDs                         | 1.91 | (1.66 to 2.20) | 1.55 | (1.42 to 1.70) |
| >1095 TSDDs                            | 1.94 | (1.73 to 2.17) | 1.56 | (1.46 to 1.67) |
| <b>Skeletal muscle relaxants</b>       |      |                |      |                |
| Non-use                                | 1.00 |                | 1.00 |                |
| 1-90 TSDDs                             | 0.86 | (0.69 to 1.06) | 1.05 | (0.90 to 1.24) |
| 91-365 TSDDs                           | 1.39 | (0.82 to 2.33) | 0.85 | (0.47 to 1.51) |
| 366-1095 TSDDs                         | 1.07 | (0.41 to 2.82) | 0.78 | (0.22 to 2.75) |
| >1095 TSDDs                            | 1.27 | (0.44 to 3.69) | 0.68 | (0.15 to 3.14) |
| <b>Gastrointestinal antispasmodics</b> |      |                |      |                |
| Non-use                                | 1.00 |                | 1.00 |                |
| 1-90 TSDDs                             | 0.92 | (0.85 to 1.00) | 0.88 | (0.83 to 0.94) |
| 91-365 TSDDs                           | 0.97 | (0.83 to 1.14) | 0.91 | (0.82 to 1.03) |
| 366-1095 TSDDs                         | 0.90 | (0.70 to 1.16) | 0.94 | (0.78 to 1.14) |
| >1095 TSDDs                            | 1.06 | (0.84 to 1.35) | 1.01 | (0.84 to 1.21) |
| <b>Antiarrhythmic drugs</b>            |      |                |      |                |
| Non-use                                | 1.00 |                | 1.00 |                |
| 1-90 TSDDs                             | 1.58 | (0.54 to 4.63) | 0.39 | (0.11 to 1.33) |
| 91-365 TSDDs                           | 1.03 | (0.27 to 3.95) | 1.53 | (0.29 to 8.07) |
| 366-1095 TSDDs                         | 1.19 | (0.32 to 4.44) | 1.24 | (0.47 to 3.28) |
| >1095 TSDDs                            | 0.55 | (0.18 to 1.67) | 1.06 | (0.60 to 1.87) |
| <b>Antiepileptics</b>                  |      |                |      |                |
| Non-use                                | 1.00 |                | 1.00 |                |
| 1-90 TSDDs                             | 0.90 | (0.75 to 1.08) | 0.87 | (0.78 to 0.98) |
| 91-365 TSDDs                           | 1.03 | (0.75 to 1.40) | 1.20 | (0.96 to 1.49) |
| 366-1095 TSDDs                         | 1.15 | (0.79 to 1.66) | 1.09 | (0.82 to 1.45) |
| >1095 TSDDs                            | 1.51 | (1.24 to 1.85) | 1.26 | (1.07 to 1.49) |
| <b>Antimuscarinic bronchodilators</b>  |      |                |      |                |
| Non-use                                | 1.00 |                | 1.00 |                |
| 1-90 TSDDs                             | 1.07 | (0.94 to 1.22) | 0.96 | (0.88 to 1.05) |
| 91-365 TSDDs                           | 1.03 | (0.88 to 1.20) | 0.93 | (0.84 to 1.04) |
| 366-1095 TSDDs                         | 0.97 | (0.82 to 1.16) | 0.97 | (0.87 to 1.08) |
| >1095 TSDDs                            | 1.02 | (0.89 to 1.18) | 0.94 | (0.86 to 1.04) |

TSDD = total standardised daily dose

<sup>a</sup> Adjusted for body mass index, smoking status, alcohol consumption, Townsend deprivation score, ethnic group, coronary heart disease, atrial fibrillation, heart failure, hypertension, hyperlipidaemia, diabetes (type 1 and type 2), stroke, transient ischaemic attack, subarachnoid haemorrhage, renal disease, asthma, chronic obstructive pulmonary disease, anxiety, depression, bipolar disorder, schizophrenia, severe head injury, cognitive decline/memory loss, antihypertensive drugs, aspirin, hypnotics, anxiolytic drugs, NSAIDs, statins and with matching by age, sex, practice and calendar time. Individual types of anticholinergic drug are also adjusted for the other anticholinergic drug types.

eTable 9 Adjusted odds ratios for cumulative use of anticholinergic drugs in the 1 to 11 years before index date: separate analyses in men and women

| Category                         | Men:<br>Cases= 21,664<br>Controls= 83,314 |                | Women:<br>Cases= 37,105<br>Controls= 142,260 |                |
|----------------------------------|-------------------------------------------|----------------|----------------------------------------------|----------------|
|                                  | Adjusted <sup>a</sup>                     |                | Adjusted <sup>a</sup>                        |                |
|                                  | OR                                        | 95% CI         | OR                                           | 95% CI         |
| <b>Cumulative use: all drugs</b> |                                           |                |                                              |                |
| Non-use                          | 1.00                                      |                | 1.00                                         |                |
| 1-90 TSDDs                       | 1.11                                      | (1.06 to 1.16) | 1.03                                         | (1.00 to 1.07) |
| 91-365 TSDDs                     | 1.26                                      | (1.19 to 1.34) | 1.12                                         | (1.07 to 1.16) |
| 366-1095 TSDDs                   | 1.44                                      | (1.35 to 1.55) | 1.31                                         | (1.24 to 1.37) |
| >1095 TSDDs                      | 1.58                                      | (1.49 to 1.67) | 1.44                                         | (1.39 to 1.50) |
|                                  |                                           |                |                                              |                |
| <b>Antihistamines</b>            |                                           |                |                                              |                |
| Non-use                          | 1.00                                      |                | 1.00                                         |                |
| 1-90 TSDDs                       | 1.08                                      | (1.01 to 1.15) | 1.00                                         | (0.96 to 1.05) |
| 91-365 TSDDs                     | 1.13                                      | (0.98 to 1.30) | 0.97                                         | (0.88 to 1.08) |
| 366-1095 TSDDs                   | 0.90                                      | (0.70 to 1.16) | 1.08                                         | (0.91 to 1.29) |
| >1095 TSDDs                      | 1.12                                      | (0.83 to 1.50) | 1.16                                         | (0.96 to 1.39) |
|                                  |                                           |                |                                              |                |
| <b>Antidepressants</b>           |                                           |                |                                              |                |
| Non-use                          | 1.00                                      |                | 1.00                                         |                |
| 1-90 TSDDs                       | 1.01                                      | (0.95 to 1.08) | 1.02                                         | (0.97 to 1.06) |
| 91-365 TSDDs                     | 1.09                                      | (1.00 to 1.18) | 1.13                                         | (1.07 to 1.19) |
| 366-1095 TSDDs                   | 1.25                                      | (1.12 to 1.39) | 1.25                                         | (1.17 to 1.33) |
| >1095 TSDDs                      | 1.33                                      | (1.23 to 1.44) | 1.28                                         | (1.22 to 1.34) |
|                                  |                                           |                |                                              |                |
| <b>Antivertigo/antiemetics</b>   |                                           |                |                                              |                |
| Non-use                          | 1.00                                      |                | 1.00                                         |                |
| 1-90 TSDDs                       | 1.11                                      | (1.06 to 1.16) | 1.02                                         | (0.99 to 1.06) |
| 91-365 TSDDs                     | 1.26                                      | (1.11 to 1.44) | 1.10                                         | (1.02 to 1.18) |
| 366-1095 TSDDs                   | 1.48                                      | (1.19 to 1.83) | 1.39                                         | (1.23 to 1.56) |
| >1095 TSDDs                      | 1.12                                      | (0.84 to 1.50) | 1.07                                         | (0.92 to 1.25) |
|                                  |                                           |                |                                              |                |
| <b>Antiparkinson agents</b>      |                                           |                |                                              |                |
| Non-use                          | 1.00                                      |                | 1.00                                         |                |
| 1-90 TSDDs                       | 1.15                                      | (0.66 to 1.99) | 0.92                                         | (0.62 to 1.36) |
| 91-365 TSDDs                     | 1.67                                      | (0.79 to 3.52) | 1.65                                         | (0.98 to 2.79) |
| 366-1095 TSDDs                   | 1.85                                      | (0.87 to 3.94) | 0.73                                         | (0.40 to 1.30) |
| >1095 TSDDs                      | 1.36                                      | (0.83 to 2.23) | 1.57                                         | (1.14 to 2.17) |
|                                  |                                           |                |                                              |                |
| <b>Antipsychotics</b>            |                                           |                |                                              |                |
| Non-use                          | 1.00                                      |                | 1.00                                         |                |
| 1-90 TSDDs                       | 1.48                                      | (1.16 to 1.89) | 1.42                                         | (1.20 to 1.69) |
| 91-365 TSDDs                     | 1.57                                      | (1.20 to 2.07) | 1.34                                         | (1.11 to 1.61) |
| 366-1095 TSDDs                   | 2.39                                      | (1.73 to 3.31) | 2.00                                         | (1.64 to 2.43) |
| >1095 TSDDs                      | 2.01                                      | (1.62 to 2.50) | 1.60                                         | (1.41 to 1.82) |
|                                  |                                           |                |                                              |                |
| <b>Bladder antimuscarinics</b>   |                                           |                |                                              |                |
| Non-use                          | 1.00                                      |                | 1.00                                         |                |
| 1-90 TSDDs                       | 1.12                                      | (1.02 to 1.24) | 1.23                                         | (1.15 to 1.32) |

|                                        |      |                |      |                |
|----------------------------------------|------|----------------|------|----------------|
| 91-365 TSDDs                           | 1.52 | (1.36 to 1.70) | 1.27 | (1.17 to 1.39) |
| 366-1095 TSDDs                         | 1.75 | (1.54 to 1.98) | 1.60 | (1.46 to 1.75) |
| >1095 TSDDs                            | 1.76 | (1.58 to 1.95) | 1.61 | (1.50 to 1.73) |
| <b>Skeletal muscle relaxants</b>       |      |                |      |                |
| Non-use                                | 1.00 |                | 1.00 |                |
| 1-90 TSDDs                             | 0.94 | (0.76 to 1.16) | 1.00 | (0.85 to 1.18) |
| 91-365 TSDDs                           | 1.01 | (0.53 to 1.93) | 1.17 | (0.73 to 1.88) |
| 366-1095 TSDDs                         | 0.90 | (0.29 to 2.81) | 1.04 | (0.38 to 2.89) |
| >1095 TSDDs                            | 1.36 | (0.41 to 4.55) | 0.92 | (0.28 to 2.95) |
| <b>Gastrointestinal antispasmodics</b> |      |                |      |                |
| Non-use                                | 1.00 |                | 1.00 |                |
| 1-90 TSDDs                             | 0.90 | (0.83 to 0.98) | 0.89 | (0.84 to 0.94) |
| 91-365 TSDDs                           | 0.93 | (0.77 to 1.11) | 0.94 | (0.84 to 1.04) |
| 366-1095 TSDDs                         | 0.91 | (0.66 to 1.25) | 0.95 | (0.80 to 1.12) |
| >1095 TSDDs                            | 1.09 | (0.81 to 1.47) | 1.03 | (0.87 to 1.22) |
| <b>Antiarrhythmic drugs</b>            |      |                |      |                |
| Non-use                                | 1.00 |                | 1.00 |                |
| 1-90 TSDDs                             | 0.35 | (0.04 to 2.95) | 0.85 | (0.36 to 2.03) |
| 91-365 TSDDs                           | 0.58 | (0.07 to 5.01) | 1.78 | (0.52 to 6.05) |
| 366-1095 TSDDs                         | 1.33 | (0.31 to 5.65) | 1.19 | (0.47 to 3.01) |
| >1095 TSDDs                            | 1.93 | (0.74 to 5.00) | 0.73 | (0.40 to 1.35) |
| <b>Antiepileptics</b>                  |      |                |      |                |
| Non-use                                | 1.00 |                | 1.00 |                |
| 1-90 TSDDs                             | 0.90 | (0.75 to 1.07) | 0.87 | (0.77 to 0.98) |
| 91-365 TSDDs                           | 1.45 | (1.09 to 1.93) | 0.99 | (0.79 to 1.25) |
| 366-1095 TSDDs                         | 1.19 | (0.83 to 1.72) | 1.09 | (0.83 to 1.45) |
| >1095 TSDDs                            | 1.47 | (1.21 to 1.78) | 1.34 | (1.13 to 1.58) |
| <b>Antimuscarinic bronchodilators</b>  |      |                |      |                |
| Non-use                                | 1.00 |                | 1.00 |                |
| 1-90 TSDDs                             | 1.03 | (0.92 to 1.15) | 0.97 | (0.88 to 1.06) |
| 91-365 TSDDs                           | 1.03 | (0.90 to 1.17) | 0.92 | (0.81 to 1.03) |
| 366-1095 TSDDs                         | 1.10 | (0.96 to 1.26) | 0.88 | (0.77 to 1.00) |
| >1095 TSDDs                            | 0.95 | (0.84 to 1.07) | 0.98 | (0.88 to 1.09) |

TSDD = total standardised daily dose

<sup>a</sup> Adjusted for body mass index, smoking status, alcohol consumption, Townsend deprivation score, ethnic group, coronary heart disease, atrial fibrillation, heart failure, hypertension, hyperlipidaemia, diabetes (type 1 and type 2), stroke, transient ischaemic attack, subarachnoid haemorrhage, renal disease, asthma, chronic obstructive pulmonary disease, anxiety, depression, bipolar disorder, schizophrenia, severe head injury, cognitive decline/memory loss, antihypertensive drugs, aspirin, hypnotics, anxiolytic drugs, NSAIDs, statins and with matching by age, sex, practice and calendar time. Individual types of anticholinergic drug are also adjusted for the other anticholinergic drug types.

eTable 10 Adjusted odds ratios for cumulative use of anticholinergic drugs in the 1 to 11 years before index date: separate analyses in cases with Alzheimer's (including mixed), cases with vascular dementia, and cases with other or unspecified types of dementia with their respective matched controls

| Category                         | Alzheimer's                     |                | Vascular dementia               |                | Other/unspecified dementia types |                |
|----------------------------------|---------------------------------|----------------|---------------------------------|----------------|----------------------------------|----------------|
|                                  | Cases=22,034<br>Controls=85,595 |                | Cases=13,313<br>Controls=51,535 |                | Cases=23,422<br>Controls=88,444  |                |
|                                  | Adjusted <sup>a</sup>           |                | Adjusted <sup>a</sup>           |                | Adjusted <sup>a</sup>            |                |
|                                  | OR                              | 95% CI         | OR                              | 95% CI         | OR                               | 95% CI         |
| <b>Cumulative use: all drugs</b> |                                 |                |                                 |                |                                  |                |
| Non-use                          | 1.00                            |                | 1.00                            |                | 1.00                             |                |
| 1-90 TSDDs                       | 1.05                            | (1.01 to 1.10) | 1.09                            | (1.03 to 1.16) | 1.05                             | (1.01 to 1.10) |
| 91-365 TSDDs                     | 1.11                            | (1.05 to 1.18) | 1.22                            | (1.14 to 1.32) | 1.18                             | (1.12 to 1.25) |
| 366-1095 TSDDs                   | 1.27                            | (1.19 to 1.36) | 1.54                            | (1.41 to 1.67) | 1.34                             | (1.26 to 1.43) |
| >1095 TSDDs                      | 1.37                            | (1.30 to 1.44) | 1.68                            | (1.57 to 1.79) | 1.51                             | (1.44 to 1.59) |
| <b>Antihistamines</b>            |                                 |                |                                 |                |                                  |                |
| Non-use                          | 1.00                            |                | 1.00                            |                | 1.00                             |                |
| 1-90 TSDDs                       | 1.05                            | (0.99 to 1.12) | 1.04                            | (0.96 to 1.12) | 0.99                             | (0.93 to 1.05) |
| 91-365 TSDDs                     | 0.99                            | (0.86 to 1.14) | 0.99                            | (0.83 to 1.18) | 1.10                             | (0.96 to 1.25) |
| 366-1095 TSDDs                   | 1.04                            | (0.82 to 1.32) | 1.24                            | (0.92 to 1.68) | 0.90                             | (0.71 to 1.14) |
| >1095 TSDDs                      | 1.23                            | (0.97 to 1.58) | 0.93                            | (0.65 to 1.34) | 1.21                             | (0.94 to 1.54) |
| <b>Antidepressants</b>           |                                 |                |                                 |                |                                  |                |
| Non-use                          | 1.00                            |                | 1.00                            |                | 1.00                             |                |
| 1-90 TSDDs                       | 1.01                            | (0.95 to 1.07) | 1.04                            | (0.97 to 1.13) | 1.01                             | (0.95 to 1.07) |
| 91-365 TSDDs                     | 1.11                            | (1.03 to 1.19) | 1.14                            | (1.04 to 1.25) | 1.13                             | (1.06 to 1.22) |
| 366-1095 TSDDs                   | 1.19                            | (1.09 to 1.30) | 1.29                            | (1.15 to 1.45) | 1.28                             | (1.17 to 1.40) |
| >1095 TSDDs                      | 1.30                            | (1.22 to 1.39) | 1.37                            | (1.27 to 1.49) | 1.24                             | (1.16 to 1.32) |
| <b>Antivertigo/antiemetics</b>   |                                 |                |                                 |                |                                  |                |
| Non-use                          | 1.00                            |                | 1.00                            |                | 1.00                             |                |
| 1-90 TSDDs                       | 1.03                            | (0.99 to 1.08) | 1.10                            | (1.04 to 1.16) | 1.04                             | (1.00 to 1.09) |
| 91-365 TSDDs                     | 1.12                            | (1.01 to 1.25) | 1.22                            | (1.07 to 1.40) | 1.11                             | (1.00 to 1.23) |
| 366-1095 TSDDs                   | 1.29                            | (1.08 to 1.54) | 1.49                            | (1.20 to 1.85) | 1.49                             | (1.26 to 1.76) |
| >1095 TSDDs                      | 0.91                            | (0.72 to 1.16) | 1.11                            | (0.84 to 1.47) | 1.24                             | (1.01 to 1.53) |
| <b>Antiparkinson drugs</b>       |                                 |                |                                 |                |                                  |                |
| Non-use                          | 1.00                            |                | 1.00                            |                | 1.00                             |                |
| 1-90 TSDDs                       | 0.71                            | (0.37 to 1.36) | 1.00                            | (0.52 to 1.91) | 1.31                             | (0.82 to 2.08) |
| 91-365 TSDDs                     | 1.12                            | (0.45 to 2.81) | 0.82                            | (0.30 to 2.21) | 2.46                             | (1.36 to 4.45) |
| 366-1095 TSDDs                   | 0.51                            | (0.19 to 1.33) | 1.46                            | (0.55 to 3.84) | 1.20                             | (0.65 to 2.23) |
| >1095 TSDDs                      | 1.16                            | (0.70 to 1.93) | 1.76                            | (0.95 to 3.28) | 1.72                             | (1.17 to 2.53) |
| <b>Antipsychotics</b>            |                                 |                |                                 |                |                                  |                |
| Non-use                          | 1.00                            |                | 1.00                            |                | 1.00                             |                |
| 1-90 TSDDs                       | 1.18                            | (0.91 to 1.52) | 1.68                            | (1.27 to 2.24) | 1.49                             | (1.21 to 1.85) |
| 91-365 TSDDs                     | 0.98                            | (0.74 to 1.29) | 1.61                            | (1.16 to 2.22) | 1.72                             | (1.37 to 2.17) |
| 366-1095 TSDDs                   | 1.29                            | (0.94 to 1.76) | 2.13                            | (1.49 to 3.07) | 2.84                             | (2.22 to 3.65) |
| >1095 TSDDs                      | 1.32                            | (1.08 to 1.62) | 1.59                            | (1.26 to 2.01) | 2.11                             | (1.79 to 2.47) |



|                                        |                   |                |                   |                |                   |                |
|----------------------------------------|-------------------|----------------|-------------------|----------------|-------------------|----------------|
|                                        |                   |                |                   |                |                   |                |
| <b>Bladder antimuscarinics</b>         |                   |                |                   |                |                   |                |
| Non-use                                | 1.00              |                | 1.00              |                | 1.00              |                |
| 1-90 TSDDs                             | 1.26              | (1.16 to 1.38) | 1.22              | (1.09 to 1.36) | 1.10              | (1.00 to 1.21) |
| 91-365 TSDDs                           | 1.20              | (1.07 to 1.34) | 1.57              | (1.37 to 1.80) | 1.37              | (1.23 to 1.54) |
| 366-1095 TSDDs                         | 1.57              | (1.39 to 1.78) | 1.80              | (1.54 to 2.09) | 1.62              | (1.44 to 1.83) |
| >1095 TSDDs                            | 1.58              | (1.43 to 1.73) | 1.89              | (1.69 to 2.13) | 1.58              | (1.44 to 1.75) |
|                                        |                   |                |                   |                |                   |                |
| <b>Skeletal muscle relaxants</b>       |                   |                |                   |                |                   |                |
| Non-use                                | 1.00              |                | 1.00              |                | 1.00              |                |
| Any use                                | 1.09 <sup>†</sup> | (0.90 to 1.32) | 0.91 <sup>†</sup> | (0.71 to 1.16) | 0.94 <sup>†</sup> | (0.77 to 1.15) |
|                                        |                   |                |                   |                |                   |                |
| <b>Gastrointestinal antispasmodics</b> |                   |                |                   |                |                   |                |
| Non-use                                | 1.00              |                | 1.00              |                | 1.00              |                |
| 1-90 TSDDs                             | 0.89              | (0.83 to 0.96) | 0.91              | (0.83 to 1.01) | 0.89              | (0.82 to 0.96) |
| 91-365 TSDDs                           | 0.98              | (0.85 to 1.13) | 1.02              | (0.84 to 1.24) | 0.84              | (0.71 to 0.98) |
| 366-1095 TSDDs                         | 0.93              | (0.74 to 1.19) | 0.98              | (0.71 to 1.35) | 0.92              | (0.71 to 1.18) |
| >1095 TSDDs                            | 0.89              | (0.70 to 1.13) | 1.23              | (0.93 to 1.63) | 1.09              | (0.85 to 1.40) |
|                                        |                   |                |                   |                |                   |                |
| <b>Antiarrhythmic drugs</b>            |                   |                |                   |                |                   |                |
| Non-use                                | 1.00              |                | 1.00              |                | 1.00              |                |
| Any use                                | 1.27 <sup>†</sup> | (0.74 to 2.17) | 1.15 <sup>†</sup> | (0.55 to 2.39) | 0.67 <sup>†</sup> | (0.36 to 1.23) |
|                                        |                   |                |                   |                |                   |                |
| <b>Antiepileptic drugs</b>             |                   |                |                   |                |                   |                |
| Non-use                                | 1.00              |                | 1.00              |                | 1.00              |                |
| 1-90 TSDDs                             | 1.22              | (0.42 to 3.50) | 1.04              | (0.85 to 1.27) | 0.86              | (0.74 to 1.01) |
| 91-365 TSDDs                           | 1.11              | (0.23 to 5.40) | 1.27              | (0.90 to 1.80) | 1.16              | (0.87 to 1.55) |
| 366-1095 TSDDs                         | 2.41              | (0.75 to 7.73) | 1.34              | (0.87 to 2.06) | 0.98              | (0.67 to 1.43) |
| >1095 TSDDs                            | 0.99              | (0.42 to 2.34) | 1.96              | (1.55 to 2.49) | 1.34              | (1.09 to 1.66) |
|                                        |                   |                |                   |                |                   |                |
| <b>Antimuscarinic bronchodilators</b>  |                   |                |                   |                |                   |                |
| Non-use                                | 1.00              |                | 1.00              |                | 1.00              |                |
| 1-90 TSDDs                             | 0.81              | (0.69 to 0.96) | 1.12              | (0.98 to 1.30) | 1.02              | (0.9 to 1.14)  |
| 91-365 TSDDs                           | 1.02              | (0.76 to 1.39) | 1.03              | (0.86 to 1.23) | 0.95              | (0.82 to 1.10) |
| 366-1095 TSDDs                         | 1.15              | (0.80 to 1.66) | 1.18              | (0.99 to 1.41) | 0.97              | (0.84 to 1.13) |
| >1095 TSDDs                            | 1.12              | (0.90 to 1.39) | 0.99              | (0.84 to 1.16) | 1.00              | (0.88 to 1.13) |

<sup>†</sup> Any use of drug group (categories combined due to small numbers)

TSDD = total standardised daily dose

<sup>a</sup> Adjusted for body mass index, smoking status, alcohol consumption, Townsend deprivation score, ethnic group, coronary heart disease, atrial fibrillation, heart failure, hypertension, hyperlipidaemia, diabetes (type 1 and type 2), stroke, transient ischaemic attack, subarachnoid haemorrhage, renal disease, asthma, chronic obstructive pulmonary disease, anxiety, depression, bipolar disorder, schizophrenia, severe head injury, cognitive decline/memory loss, antihypertensive drugs, aspirin, hypnotics, anxiolytic drugs, NSAIDs, statins and with matching by age, sex, practice and calendar time. Individual types of anticholinergic drug are also adjusted for the other anticholinergic drug types.

eTable 11 Adjusted odds ratios for total cumulative use in defined daily doses (DDDs) of anticholinergic drugs in 1 to 11, 3 to 13 and 5 to 20 years before the index date

| Cumulative use (total DDDs)<br>Category            | Cases        | Controls      | Adjusted <sup>a</sup> |                |
|----------------------------------------------------|--------------|---------------|-----------------------|----------------|
|                                                    | n (%)        | n (%)         | OR                    | 95% CI         |
| <b>Exposure in 1 to 11 years before index date</b> |              |               |                       |                |
|                                                    | N=58,769     | N=225,574     |                       |                |
| Non-use                                            | 25516 (43.4) | 110478 (49.0) | 1.00                  |                |
| 1-90 DDDs                                          | 18239 (31.0) | 70614 (31.3)  | 1.10                  | (1.07 to 1.12) |
| 91-365 DDDs                                        | 5272 (9.0)   | 17002 (7.5)   | 1.31                  | (1.26 to 1.36) |
| 366-1095 DDDs                                      | 4402 (7.5)   | 12826 (5.7)   | 1.43                  | (1.37 to 1.49) |
| >1095 DDDs                                         | 5340 (9.1)   | 14654 (6.5)   | 1.52                  | (1.46 to 1.58) |
| <b>Exposure in 3 to 13 years before index date</b> |              |               |                       |                |
|                                                    | N=45,621     | N=169,020     |                       |                |
| Non-use                                            | 20545 (45.0) | 84676 (50.1)  | 1.00                  |                |
| 1-90 DDDs                                          | 14191 (31.1) | 52954 (31.3)  | 1.08                  | (1.05 to 1.11) |
| 91-365 DDDs                                        | 4008 (8.8)   | 12434 (7.4)   | 1.29                  | (1.23 to 1.35) |
| 366-1095 DDDs                                      | 3121 (6.8)   | 8979 (5.3)    | 1.37                  | (1.30 to 1.44) |
| >1095 DDDs                                         | 3756 (8.2)   | 9977 (5.9)    | 1.50                  | (1.43 to 1.57) |
| <b>Exposure in 5 to 20 years before index date</b> |              |               |                       |                |
|                                                    | N=8,283      | N= 27,200     |                       |                |
| Non-use                                            | 3335 (40.3)  | 12281 (45.2)  | 1.00                  |                |
| 1-90 DDDs                                          | 2784 (33.6)  | 9416 (34.6)   | 1.07                  | (1.01 to 1.14) |
| 91-365 DDDs                                        | 844 (10.2)   | 2260 (8.3)    | 1.29                  | (1.17 to 1.42) |
| 366-1095 DDDs                                      | 593 (7.2)    | 1439 (5.3)    | 1.47                  | (1.31 to 1.65) |
| >1095 DDDs                                         | 727 (8.8)    | 1804 (6.6)    | 1.46                  | (1.31 to 1.63) |

DDD = defined daily dose (WHO)

<sup>a</sup> Adjusted for body mass index, smoking status, alcohol consumption, Townsend deprivation score, ethnic group, coronary heart disease, atrial fibrillation, heart failure, hypertension, hyperlipidaemia, diabetes (type 1 and type 2), stroke, transient ischaemic attack, subarachnoid haemorrhage, renal disease, asthma, chronic obstructive pulmonary disease, anxiety, depression, bipolar disorder, schizophrenia, severe head injury, cognitive decline/memory loss, antihypertensive drugs, aspirin, hypnotics, anxiolytic drugs, NSAIDs, statins and with matching by age, sex, practice and calendar time.

eTable 12 Adjusted odds ratios for cumulative use of anticholinergic drugs in 1 to 11 years before index date: multiple imputation results

| Category                           | Complete case analysis |                | Multiple imputation analysis |                |
|------------------------------------|------------------------|----------------|------------------------------|----------------|
|                                    | Adjusted <sup>a</sup>  |                | Adjusted <sup>a</sup>        |                |
|                                    | OR                     | 95% CI         | OR                           | 95% CI         |
| <b>Cumulative use (TSDDs)</b>      |                        |                |                              |                |
| Non-use                            | 1.00                   |                | 1.00                         |                |
| 1-90 TSDDs                         | 1.06                   | (1.03 to 1.09) | 1.07                         | (1.04 to 1.10) |
| 91-365 TSDDs                       | 1.17                   | (1.13 to 1.21) | 1.17                         | (1.13 to 1.21) |
| 366-1095 TSDDs                     | 1.36                   | (1.30 to 1.41) | 1.35                         | (1.30 to 1.41) |
| >1095 TSDDs                        | 1.49                   | (1.44 to 1.54) | 1.49                         | (1.44 to 1.53) |
|                                    |                        |                |                              |                |
| <b>Cumulative use (total DDDs)</b> |                        |                |                              |                |
| Non-use                            | 1.00                   |                | 1.00                         |                |
| 1-90 DDDs                          | 1.10                   | (1.07 to 1.12) | 1.10                         | (1.08 to 1.13) |
| 91-365 DDDs                        | 1.31                   | (1.26 to 1.36) | 1.31                         | (1.26 to 1.35) |
| 366-1095 DDDs                      | 1.43                   | (1.37 to 1.49) | 1.43                         | (1.38 to 1.49) |
| >1095 DDDs                         | 1.52                   | (1.46 to 1.58) | 1.51                         | (1.46 to 1.57) |
|                                    |                        |                |                              |                |

TSDD = total standardised daily dose

DDD = defined daily dose

<sup>a</sup> Adjusted for body mass index, smoking status, alcohol consumption, Townsend deprivation score, ethnic group, coronary heart disease, atrial fibrillation, heart failure, hypertension, hyperlipidaemia, diabetes (type 1 and type 2), stroke, transient ischaemic attack, subarachnoid haemorrhage, renal disease, asthma, chronic obstructive pulmonary disease, anxiety, depression, bipolar disorder, schizophrenia, severe head injury, cognitive decline/memory loss, antihypertensive drugs, aspirin, hypnotics, anxiolytic drugs, NSAIDs, statins and with matching by age, sex, practice and calendar time.

eTable 13 Adjusted odds ratios for cumulative use of anticholinergic drugs in the 1 to 11 years before index date: restricted to the anticholinergic drugs included in the study by Gray<sup>1</sup>

| Category                         | Cases<br>(N=58,769) | Controls<br>(N=225,574) | Unadjusted |                | Adjusted <sup>a</sup> |                |
|----------------------------------|---------------------|-------------------------|------------|----------------|-----------------------|----------------|
|                                  | N (%)               | N (%)                   | OR         | 95% CI         | OR                    | 95% CI         |
| <b>Cumulative use: all drugs</b> |                     |                         |            |                |                       |                |
| Non-use                          | 28390 (48.3)        | 120310 (53.3)           | 1.00       |                | 1.00                  |                |
| 1-90 TSDDs                       | 13149 (22.4)        | 52200 (23.1)            | 1.07       | (1.05 to 1.10) | 1.05                  | (1.02 to 1.08) |
| 91-365 TSDDs                     | 5984 (10.2)         | 21477 (9.5)             | 1.19       | (1.16 to 1.23) | 1.16                  | (1.12 to 1.20) |
| 366-1095 TSDDs                   | 3791 (6.5)          | 11304 (5.0)             | 1.43       | (1.38 to 1.49) | 1.39                  | (1.33 to 1.45) |
| >1095 TSDDs                      | 7455 (12.7)         | 20283 (9.0)             | 1.58       | (1.53 to 1.63) | 1.49                  | (1.44 to 1.55) |
| <b>Antihistamines</b>            |                     |                         |            |                |                       |                |
| Non-use                          | 52312 (89)          | 202429 (89.7)           | 1.00       |                | 1.00                  |                |
| 1-90 TSDDs                       | 4987 (8.5)          | 18187 (8.1)             | 1.02       | (0.99 to 1.06) | 1.03                  | (0.99 to 1.07) |
| 91-365 TSDDs                     | 923 (1.6)           | 3105 (1.4)              | 1.07       | (0.99 to 1.16) | 1.03                  | (0.95 to 1.12) |
| 366-1095 TSDDs                   | 280 (0.5)           | 1022 (0.5)              | 0.98       | (0.86 to 1.13) | 1.02                  | (0.88 to 1.18) |
| >1095 TSDDs                      | 267 (0.5)           | 831 (0.4)               | 1.15       | (0.99 to 1.32) | 1.15                  | (0.98 to 1.34) |
| <b>Antidepressants</b>           |                     |                         |            |                |                       |                |
| Non-use                          | 45097 (76.7)        | 179412 (79.5)           | 1.00       |                | 1.00                  |                |
| 1-90 TSDDs                       | 4566 (7.8)          | 17760 (7.9)             | 1.00       | (0.97 to 1.04) | 0.98                  | (0.94 to 1.02) |
| 91-365 TSDDs                     | 3058 (5.2)          | 10786 (4.8)             | 1.10       | (1.06 to 1.15) | 1.07                  | (1.02 to 1.12) |
| 366-1095 TSDDs                   | 1822 (3.1)          | 5609 (2.5)              | 1.23       | (1.17 to 1.30) | 1.21                  | (1.14 to 1.28) |
| >1095 TSDDs                      | 4226 (7.2)          | 12007 (5.3)             | 1.33       | (1.28 to 1.38) | 1.26                  | (1.21 to 1.31) |
| <b>Antivertigo/antiemetic</b>    |                     |                         |            |                |                       |                |
| Non-use                          | 44800 (76.2)        | 176584 (78.3)           | 1.00       |                | 1.00                  |                |
| 1-90 TSDDs                       | 11427 (19.4)        | 41159 (18.3)            | 1.07       | (1.04 to 1.09) | 1.05                  | (1.02 to 1.08) |
| 91-365 TSDDs                     | 1574 (2.7)          | 5026 (2.2)              | 1.16       | (1.09 to 1.23) | 1.15                  | (1.08 to 1.23) |
| 366-1095 TSDDs                   | 617 (1.1)           | 1659 (0.7)              | 1.37       | (1.24 to 1.50) | 1.43                  | (1.28 to 1.58) |
| >1095 TSDDs                      | 351 (0.6)           | 1146 (0.5)              | 1.09       | (0.96 to 1.23) | 1.10                  | (0.96 to 1.26) |
| <b>Antiparkinson agents</b>      |                     |                         |            |                |                       |                |
| Non-use                          | 58477 (99.5)        | 225047 (99.8)           | 1.00       |                | 1.00                  |                |
| 1-90 TSDDs                       | 68 (0.1)            | 179 (0.1)               | 1.09       | (0.81 to 1.45) | 1.04                  | (0.75 to 1.43) |
| 91-365 TSDDs                     | 50 (0.1)            | 59 (0)                  | 2.19       | (1.48 to 3.24) | 1.76                  | (1.15 to 2.71) |
| 366-1095 TSDDs                   | 39 (0.1)            | 71 (0)                  | 1.41       | (0.94 to 2.12) | 1.11                  | (0.71 to 1.74) |
| >1095 TSDDs                      | 135 (0.2)           | 218 (0.1)               | 1.66       | (1.32 to 2.09) | 1.55                  | (1.18 to 2.03) |
| <b>Antipsychotics</b>            |                     |                         |            |                |                       |                |
| Non-use                          | 57432 (97.7)        | 222927 (98.8)           | 1.00       |                | 1.00                  |                |
| 1-90 TSDDs                       | 270 (0.5)           | 663 (0.3)               | 1.48       | (1.28 to 1.72) | 1.39                  | (1.18 to 1.64) |
| 91-365 TSDDs                     | 246 (0.4)           | 591 (0.3)               | 1.47       | (1.26 to 1.71) | 1.23                  | (1.04 to 1.47) |
| 366-1095 TSDDs                   | 218 (0.4)           | 372 (0.2)               | 2.11       | (1.78 to 2.50) | 2.08                  | (1.72 to 2.53) |
| >1095 TSDDs                      | 603 (1.0)           | 1021 (0.5)              | 1.90       | (1.71 to 2.12) | 1.68                  | (1.48 to 1.91) |
| <b>Bladder antimuscarinics</b>   |                     |                         |            |                |                       |                |
| Non-use                          | 51933 (88.4)        | 206879 (91.7)           | 1.00       |                | 1.00                  |                |

|                                        |              |               |      |                |      |                |
|----------------------------------------|--------------|---------------|------|----------------|------|----------------|
| 1-90 TSDDs                             | 2144 (3.7)   | 7008 (3.1)    | 1.19 | (1.13 to 1.25) | 1.20 | (1.14 to 1.27) |
| 91-365 TSDDs                           | 1420 (2.4)   | 4069 (1.8)    | 1.34 | (1.26 to 1.43) | 1.37 | (1.28 to 1.46) |
| 366-1095 TSDDs                         | 1251 (2.1)   | 2935 (1.3)    | 1.65 | (1.54 to 1.77) | 1.67 | (1.55 to 1.80) |
| >1095 TSDDs                            | 2021 (3.4)   | 4683 (2.1)    | 1.65 | (1.57 to 1.75) | 1.65 | (1.55 to 1.75) |
| <b>Gastrointestinal antispasmodics</b> |              |               |      |                |      |                |
| Non-use                                | 54733 (93.1) | 210093 (93.1) | 1.00 |                | 1.00 |                |
| 1-90 TSDDs                             | 2765 (4.7)   | 10914 (4.8)   | 0.91 | (0.87 to 0.95) | 0.90 | (0.86 to 0.94) |
| 91-365 TSDDs                           | 722 (1.2)    | 2686 (1.2)    | 0.95 | (0.87 to 1.04) | 0.94 | (0.86 to 1.03) |
| 366-1095 TSDDs                         | 267 (0.5)    | 938 (0.4)     | 1.00 | (0.87 to 1.15) | 0.94 | (0.81 to 1.10) |
| >1095 TSDDs                            | 282 (0.5)    | 943 (0.4)     | 1.05 | (0.92 to 1.20) | 1.05 | (0.91 to 1.22) |
| <b>Antiarrhythmics</b>                 |              |               |      |                |      |                |
| Non-use                                | 58720 (99.9) | 225402 (99.9) | 1.00 |                | 1.00 |                |
| 1-90 TSDDs                             | 9 (0)        | 37 (0)        | 0.88 | (0.42 to 1.84) | 0.73 | (0.33 to 1.62) |
| 91-365 TSDDs                           | 7 (0)        | 20 (0)        | 1.33 | (0.56 to 3.17) | 1.23 | (0.43 to 3.47) |
| 366-1095 TSDDs                         | 10 (0)       | 27 (0)        | 1.17 | (0.55 to 2.48) | 1.25 | (0.57 to 2.71) |
| >1095 TSDDs                            | 23 (0)       | 88 (0)        | 0.98 | (0.61 to 1.57) | 0.93 | (0.56 to 1.54) |
| <b>Antimuscarinic bronchodilators</b>  |              |               |      |                |      |                |
| Non-use                                | 58764 (100)  | 225527 (100)  | 1.00 |                | 1.00 |                |
| Any use <sup>†</sup>                   | 5 (0)        | 47 (0)        | 0.44 | (0.17 to 1.11) | 0.43 | (0.17 to 1.12) |

TSDD = total standardised daily dose

<sup>†</sup> Exposure grouped as non-use, any use due to small numbers

<sup>a</sup> Adjusted for other anticholinergic drug types, body mass index, smoking status, alcohol consumption, Townsend deprivation score, ethnic group, coronary heart disease, atrial fibrillation, heart failure, hypertension, hyperlipidaemia, diabetes (type 1 and type 2), stroke, transient ischaemic attack, subarachnoid haemorrhage, renal disease, asthma, chronic obstructive pulmonary disease, anxiety, depression, bipolar disorder, schizophrenia, severe head injury, cognitive decline/memory loss, antihypertensive drugs, aspirin, hypnotics, anxiolytic drugs, NSAIDs, statins and with matching by age, sex, practice and calendar time.

1. Gray SL, Anderson ML, Dublin S, et al. Cumulative use of strong anticholinergics and incident dementia: A prospective cohort study. *JAMA Internal Medicine* 2015;175 (3):401-07.
